# Supplementary material
Source: publisher figshare collection journal article supplement (https://acs.figshare.com/ndownloader/files/4146382)
Supplement: Supplementary file 1 [file 4146382]

data_compound_11
_database_code_depnum_ccdc_archive 'CCDC 860577'
#TrackingRef '8890_web_deposit_cif_file_0_GaryJ.Balaich_1325623700.6pyr.cif'

_audit_creation_method           'APEX2 v2009.7-0'

_chemical_name_systematic        6-(1-pyrene)-1,3-diphenylfulvene
_chemical_name_common            6-(1-pyrene)-1,3-diphenylfulvene
_chemical_formula_moiety         'C34 H22'
_chemical_formula_sum            'C34 H22'
_chemical_formula_iupac          'C34 H22'
_chemical_formula_weight         430.52
_chemical_melting_point          ?

_symmetry_cell_setting           orthorhombic
_symmetry_space_group_name_H-M   'P b c a'
_symmetry_space_group_name_Hall  '-P 2ac 2ab'
loop_
_symmetry_equiv_pos_as_xyz
'x, y, z'
'-x+1/2, -y, z+1/2'
'-x, y+1/2, -z+1/2'
'x+1/2, -y+1/2, -z'
'-x, -y, -z'
'x-1/2, y, -z-1/2'
'x, -y-1/2, z-1/2'
'-x-1/2, y-1/2, z'

_cell_length_a                   8.8631(5)
_cell_length_b                   19.8424(14)
_cell_length_c                   25.717(2)
_cell_angle_alpha                90
_cell_angle_beta                 90
_cell_angle_gamma                90
_cell_volume                     4522.6(6)
_cell_formula_units_Z            8
_cell_measurement_reflns_used    6128
_cell_measurement_theta_min      2.2002
_cell_measurement_theta_max      25.2000
_cell_measurement_temperature    100.(2)

_exptl_crystal_description       prism
_exptl_crystal_colour            black
_exptl_crystal_size_max          0.30
_exptl_crystal_size_mid          0.18
_exptl_crystal_size_min          0.13
_exptl_crystal_density_diffrn    1.265
_exptl_crystal_density_meas      ?
_exptl_crystal_density_method    'not measured'
_exptl_crystal_F_000             1808

_exptl_absorpt_coefficient_mu    0.072
_exptl_absorpt_correction_type   multi-scan
_exptl_absorpt_process_details   'Bruker SADABS, Version 2008/1'
_exptl_absorpt_correction_T_min  0.90
_exptl_absorpt_correction_T_max  0.99

_exptl_special_details           
;
;

_diffrn_ambient_temperature      100.(2)

_diffrn_radiation_type           MoK\a
_diffrn_radiation_wavelength     0.71073
_diffrn_radiation_source         'fine-focus sealed tube'
_diffrn_radiation_monochromator  graphite

_diffrn_measurement_device_type  'Bruker SMART APEX CCD'
_diffrn_measurement_method       'phi and omega scans'

_diffrn_detector_area_resol_mean 8.3333

_diffrn_reflns_number            28801
_diffrn_reflns_av_R_equivalents  0.0347
_diffrn_reflns_av_sigmaI/netI    0.0217
_diffrn_reflns_theta_min         2.05
_diffrn_reflns_theta_max         25.43
_diffrn_reflns_theta_full        25.43
_diffrn_measured_fraction_theta_max 0.998
_diffrn_measured_fraction_theta_full 0.998
_diffrn_reflns_limit_h_min       -10
_diffrn_reflns_limit_h_max       9
_diffrn_reflns_limit_k_min       -23
_diffrn_reflns_limit_k_max       23
_diffrn_reflns_limit_l_min       -31
_diffrn_reflns_limit_l_max       30

_refine_special_details          
;
Refinement of F^2^ against ALL reflections. The weighted R-factor wR and
goodness of fit S are based on F^2^, conventional R-factors R are based
on F, with F set to zero for negative F^2^. The threshold expression of
F^2^ > 2sigma(F^2^) is used only for calculating R-factors(gt) etc. and is
not relevant to the choice of reflections for refinement. R-factors based
on F^2^ are statistically about twice as large as those based on F, and R-
factors based on ALL data will be even larger.
;

_reflns_number_total             4166
_reflns_number_gt                3410
_reflns_threshold_expression     >2sigma(I)

_refine_ls_structure_factor_coef Fsqd
_refine_ls_matrix_type           full
_refine_ls_R_factor_all          0.0499
_refine_ls_R_factor_gt           0.0375
_refine_ls_wR_factor_gt          0.0844
_refine_ls_wR_factor_ref         0.0924
_refine_ls_goodness_of_fit_ref   1.032
_refine_ls_restrained_S_all      1.032
_refine_ls_number_reflns         4166
_refine_ls_number_parameters     307
_refine_ls_number_restraints     0
_refine_ls_hydrogen_treatment    constr
_refine_ls_weighting_scheme      calc
_refine_ls_weighting_details     
'calc w=1/[\s^2^(Fo^2^)+(0.0368P)^2^+1.9925P] where P=(Fo^2^+2Fc^2^)/3'

_atom_sites_solution_hydrogens   geom
_atom_sites_solution_primary     direct
_atom_sites_solution_secondary   difmap

_refine_ls_shift/su_max          0.001
_refine_ls_shift/su_mean         0.000
_refine_diff_density_max         0.233
_refine_diff_density_min         -0.180
_refine_ls_extinction_method     none
_refine_ls_extinction_coef       ?

loop_
_atom_type_symbol
_atom_type_description
_atom_type_scat_dispersion_real
_atom_type_scat_dispersion_imag
_atom_type_scat_source
C C 0.0033 0.0016 'International Tables Vol C Tables 4.2.6.8 and 6.1.1.4'
H H 0.0000 0.0000 'International Tables Vol C Tables 4.2.6.8 and 6.1.1.4'

_computing_data_collection       'Bruker SMART APEX CCD'
_computing_cell_refinement       'SAINT V7.66A (Bruker AXS, 2009)'
_computing_data_reduction        'SAINT V7.66A (Bruker AXS, 2009)'
_computing_structure_solution    'SHELXS-97 (Sheldrick, 2008)'
_computing_structure_refinement  'SHELXL-97 (Sheldrick, 2008)'
_computing_molecular_graphics    'Bruker SHELXTL'
_computing_publication_material  'Bruker SHELXTL'

loop_
_atom_site_type_symbol
_atom_site_label
_atom_site_fract_x
_atom_site_fract_y
_atom_site_fract_z
_atom_site_U_iso_or_equiv
_atom_site_adp_type
_atom_site_calc_flag
_atom_site_refinement_flags
_atom_site_occupancy
_atom_site_disorder_assembly
_atom_site_disorder_group
C C1 0.14264(14) 0.28239(6) 0.66512(5) 0.0213(2) Uani d . 1 . .
C C2 0.17868(14) 0.34227(6) 0.68701(5) 0.0216(2) Uani d . 1 . .
H H2 0.1142 0.3677 0.709 0.026 Uiso calc R 1 . .
C C3 0.33181(16) 0.36211(6) 0.67177(5) 0.0217(2) Uani d . 1 . .
C C4 0.38945(16) 0.31270(6) 0.64075(5) 0.0220(2) Uani d . 1 . .
H H4 0.4868 0.3129 0.6253 0.026 Uiso calc R 1 . .
C C5 0.27690(14) 0.25956(6) 0.63516(5) 0.0212(2) Uani d . 1 . .
C C6 0.28985(16) 0.19827(6) 0.61218(5) 0.0218(2) Uani d . 1 . .
H H6 0.2101 0.1673 0.6185 0.026 Uiso calc R 1 . .
C C7 -0.00385(14) 0.24804(6) 0.66909(5) 0.0211(2) Uani d . 1 . .
C C8 -0.07279(16) 0.21836(6) 0.62579(5) 0.0237(2) Uani d . 1 . .
H H8 -0.0221 0.2186 0.5932 0.028 Uiso calc R 1 . .
C C9 -0.21362(16) 0.18862(6) 0.62963(6) 0.0267(2) Uani d . 1 . .
H H9 -0.2589 0.1691 0.5997 0.032 Uiso calc R 1 . .
C C10 -0.28893(16) 0.18723(6) 0.67686(6) 0.0266(2) Uani d . 1 . .
H H10 -0.3855 0.1667 0.6795 0.032 Uiso calc R 1 . .
C C11 -0.22192(16) 0.21613(6) 0.72025(6) 0.0269(2) Uani d . 1 . .
H H11 -0.2727 0.2151 0.7528 0.032 Uiso calc R 1 . .
C C12 -0.08138(14) 0.24647(6) 0.71644(6) 0.0242(2) Uani d . 1 . .
H H12 -0.0372 0.2664 0.7464 0.029 Uiso calc R 1 . .
C C13 0.40007(16) 0.42710(6) 0.68623(5) 0.0230(2) Uani d . 1 . .
C C14 0.34541(17) 0.46390(6) 0.72857(6) 0.0281(2) Uani d . 1 . .
H H14 0.2682 0.4454 0.7499 0.034 Uiso calc R 1 . .
C C15 0.40302(18) 0.52730(8) 0.73977(6) 0.0337(4) Uani d . 1 . .
H H15 0.3653 0.5518 0.7687 0.04 Uiso calc R 1 . .
C C16 0.51470(18) 0.55512(8) 0.70916(6) 0.0336(4) Uani d . 1 . .
H H16 0.5524 0.5989 0.7166 0.04 Uiso calc R 1 . .
C C17 0.57151(18) 0.51891(6) 0.66752(6) 0.0329(4) Uani d . 1 . .
H H17 0.6493 0.5377 0.6466 0.039 Uiso calc R 1 . .
C C18 0.51535(16) 0.45545(6) 0.65619(6) 0.0273(2) Uani d . 1 . .
H H18 0.5556 0.4309 0.6277 0.033 Uiso calc R 1 . .
C C19 0.41269(14) 0.17429(6) 0.57874(5) 0.0209(2) Uani d . 1 . .
C C20 0.47592(16) 0.21686(6) 0.54088(5) 0.0235(2) Uani d . 1 . .
H H20 0.4441 0.2625 0.5391 0.028 Uiso calc R 1 . .
C C21 0.58336(16) 0.19374(6) 0.50624(5) 0.0251(2) Uani d . 1 . .
H H21 0.6231 0.2236 0.4808 0.03 Uiso calc R 1 . .
C C22 0.74618(17) 0.10123(8) 0.47257(5) 0.0282(2) Uani d . 1 . .
H H22 0.7857 0.1301 0.4464 0.034 Uiso calc R 1 . .
C C23 0.79610(17) 0.03707(8) 0.47552(6) 0.0293(2) Uani d . 1 . .
H H23 0.8697 0.0217 0.4514 0.035 Uiso calc R 1 . .
C C24 0.78883(16) -0.07556(8) 0.51788(6) 0.0293(2) Uani d . 1 . .
H H24 0.8625 -0.0919 0.4942 0.035 Uiso calc R 1 . .
C C25 0.73107(17) -0.11831(8) 0.55535(6) 0.0318(4) Uani d . 1 . .
H H25 0.7645 -0.1637 0.5569 0.038 Uiso calc R 1 . .
C C26 0.62451(17) -0.09532(6) 0.59071(6) 0.0298(2) Uani d . 1 . .
H H26 0.5869 -0.125 0.6166 0.036 Uiso calc R 1 . .
C C27 0.46121(16) -0.00332(6) 0.62407(6) 0.0271(2) Uani d . 1 . .
H H27 0.4231 -0.0322 0.6505 0.032 Uiso calc R 1 . .
C C28 0.40932(16) 0.06065(6) 0.62112(5) 0.0238(2) Uani d . 1 . .
H H28 0.3359 0.0756 0.6454 0.029 Uiso calc R 1 . .
C C29 0.46283(14) 0.10650(6) 0.58200(5) 0.0204(2) Uani d . 1 . .
C C30 0.63467(16) 0.12697(6) 0.50800(5) 0.0233(2) Uani d . 1 . .
C C31 0.57489(14) 0.08297(6) 0.54655(5) 0.0205(2) Uani d . 1 . .
C C32 0.62892(14) 0.01530(6) 0.54982(5) 0.0223(2) Uani d . 1 . .
C C33 0.57189(16) -0.02888(6) 0.58860(6) 0.0249(2) Uani d . 1 . .
C C34 0.74006(16) -0.00829(6) 0.51435(5) 0.0254(2) Uani d . 1 . .

loop_
_atom_site_aniso_label
_atom_site_aniso_U_11
_atom_site_aniso_U_22
_atom_site_aniso_U_33
_atom_site_aniso_U_12
_atom_site_aniso_U_13
_atom_site_aniso_U_23
C1 0.0222(7) 0.0210(7) 0.0207(7) 0.0019(5) -0.0030(5) 0.0018(5)
C2 0.0221(7) 0.0208(7) 0.0219(7) 0.0016(5) -0.0022(5) -0.0003(5)
C3 0.0230(7) 0.0221(7) 0.0199(7) 0.0005(5) -0.0044(5) 0.0022(5)
C4 0.0214(7) 0.0230(7) 0.0216(7) -0.0004(5) -0.0015(5) 0.0011(5)
C5 0.0225(7) 0.0224(7) 0.0189(7) 0.0016(5) -0.0029(5) 0.0010(5)
C6 0.0220(7) 0.0217(7) 0.0218(7) -0.0014(5) -0.0024(5) 0.0007(5)
C7 0.0209(7) 0.0176(5) 0.0249(7) 0.0040(5) -0.0032(5) -0.0003(5)
C8 0.0263(8) 0.0238(7) 0.0211(7) -0.0010(5) -0.0015(5) 0.0007(5)
C9 0.0275(8) 0.0262(7) 0.0263(8) -0.0018(5) -0.0072(5) -0.0002(5)
C10 0.0196(7) 0.0266(7) 0.0337(8) -0.0006(5) -0.0025(5) 0.0010(5)
C11 0.0232(8) 0.0294(8) 0.0281(8) 0.0042(5) 0.0032(5) -0.0033(5)
C12 0.0229(7) 0.0240(7) 0.0256(7) 0.0036(5) -0.0018(5) -0.0064(5)
C13 0.0228(7) 0.0206(7) 0.0255(7) 0.0008(5) -0.0062(5) 0.0004(5)
C14 0.0281(8) 0.0280(8) 0.0284(8) -0.0037(5) 0.0017(5) -0.0037(5)
C15 0.0335(9) 0.0297(8) 0.0380(9) -0.0032(7) 0.0012(7) -0.0117(7)
C16 0.0303(9) 0.0240(7) 0.0465(10) -0.0050(5) -0.0016(7) -0.0069(7)
C17 0.0274(8) 0.0297(8) 0.0417(9) -0.0061(7) 0.0040(7) -0.0002(7)
C18 0.0265(8) 0.0263(7) 0.0290(8) -0.0020(5) 0.0007(5) -0.0034(5)
C19 0.0216(7) 0.0219(7) 0.0193(7) -0.0018(5) -0.0034(5) -0.0036(5)
C20 0.0253(8) 0.0223(7) 0.0228(7) -0.0013(5) -0.0052(5) -0.0007(5)
C21 0.0277(8) 0.0283(7) 0.0192(7) -0.0038(5) -0.0014(5) 0.0029(5)
C22 0.0277(8) 0.0362(8) 0.0205(7) -0.0057(7) 0.0013(5) -0.0016(5)
C23 0.0236(8) 0.0391(9) 0.0251(8) -0.0002(7) 0.0023(5) -0.0090(7)
C24 0.0196(7) 0.0341(8) 0.0343(9) 0.0022(5) -0.0032(5) -0.0134(7)
C25 0.0261(8) 0.0248(7) 0.0444(9) 0.0016(5) -0.0075(7) -0.0084(7)
C26 0.0254(8) 0.0238(7) 0.0401(9) -0.0029(5) -0.0027(7) -0.0016(5)
C27 0.0270(8) 0.0230(7) 0.0312(8) -0.0044(5) 0.0037(5) 0.0010(5)
C28 0.0233(7) 0.0236(7) 0.0246(7) -0.0033(5) 0.0033(5) -0.0021(5)
C29 0.0196(7) 0.0221(7) 0.0195(7) -0.0040(5) -0.0029(5) -0.0035(5)
C30 0.0221(7) 0.0285(8) 0.0192(7) -0.0047(5) -0.0028(5) -0.0032(5)
C31 0.0185(7) 0.0235(7) 0.0194(7) -0.0038(5) -0.0030(5) -0.0049(5)
C32 0.0182(7) 0.0246(7) 0.0240(7) -0.0037(5) -0.0034(5) -0.0065(5)
C33 0.0205(7) 0.0219(7) 0.0323(8) -0.0029(5) -0.0029(5) -0.0040(5)
C34 0.0195(7) 0.0290(8) 0.0277(8) -0.0017(5) -0.0038(5) -0.0087(5)

_geom_special_details            
;
All esds (except the esd in the dihedral angle between two l.s. planes)
are estimated using the full covariance matrix. The cell esds are taken
into account individually in the estimation of esds in distances, angles
and torsion angles; correlations between esds in cell parameters are only
used when they are defined by crystal symmetry. An approximate (isotropic)
treatment of cell esds is used for estimating esds involving l.s. planes.
;

loop_
_geom_bond_atom_site_label_1
_geom_bond_atom_site_label_2
_geom_bond_site_symmetry_2
_geom_bond_distance
_geom_bond_publ_flag
C1 C2 . 1.353(2) ?
C1 C7 . 1.470(2) ?
C1 C5 . 1.488(2) ?
C2 C3 . 1.467(2) ?
C2 H2 . 0.95 ?
C3 C4 . 1.363(2) ?
C3 C13 . 1.472(2) ?
C4 C5 . 1.459(2) ?
C4 H4 . 0.95 ?
C5 C6 . 1.357(2) ?
C6 C19 . 1.467(2) ?
C6 H6 . 0.95 ?
C7 C12 . 1.399(2) ?
C7 C8 . 1.400(2) ?
C8 C9 . 1.384(2) ?
C8 H8 . 0.95 ?
C9 C10 . 1.386(2) ?
C9 H9 . 0.95 ?
C10 C11 . 1.388(2) ?
C10 H10 . 0.95 ?
C11 C12 . 1.387(2) ?
C11 H11 . 0.95 ?
C12 H12 . 0.95 ?
C13 C14 . 1.398(2) ?
C13 C18 . 1.399(2) ?
C14 C15 . 1.388(2) ?
C14 H14 . 0.95 ?
C15 C16 . 1.380(2) ?
C15 H15 . 0.95 ?
C16 C17 . 1.384(2) ?
C16 H16 . 0.95 ?
C17 C18 . 1.385(2) ?
C17 H17 . 0.95 ?
C18 H18 . 0.95 ?
C19 C20 . 1.406(2) ?
C19 C29 . 1.4191(18) ?
C20 C21 . 1.382(2) ?
C20 H20 . 0.95 ?
C21 C30 . 1.402(2) ?
C21 H21 . 0.95 ?
C22 C23 . 1.350(2) ?
C22 C30 . 1.438(2) ?
C22 H22 . 0.95 ?
C23 C34 . 1.433(2) ?
C23 H23 . 0.95 ?
C24 C25 . 1.382(2) ?
C24 C34 . 1.406(2) ?
C24 H24 . 0.95 ?
C25 C26 . 1.388(2) ?
C25 H25 . 0.95 ?
C26 C33 . 1.399(2) ?
C26 H26 . 0.95 ?
C27 C28 . 1.352(2) ?
C27 C33 . 1.432(2) ?
C27 H27 . 0.95 ?
C28 C29 . 1.437(2) ?
C28 H28 . 0.95 ?
C29 C31 . 1.427(2) ?
C30 C31 . 1.423(2) ?
C31 C32 . 1.428(2) ?
C32 C33 . 1.421(2) ?
C32 C34 . 1.422(2) ?

loop_
_geom_angle_atom_site_label_1
_geom_angle_atom_site_label_2
_geom_angle_atom_site_label_3
_geom_angle_site_symmetry_1
_geom_angle_site_symmetry_3
_geom_angle
_geom_angle_publ_flag
C2 C1 C7 . . 125.93(13) ?
C2 C1 C5 . . 107.09(12) ?
C7 C1 C5 . . 126.95(12) ?
C1 C2 C3 . . 110.06(12) ?
C1 C2 H2 . . 125.0 ?
C3 C2 H2 . . 125.0 ?
C4 C3 C2 . . 108.07(12) ?
C4 C3 C13 . . 128.59(13) ?
C2 C3 C13 . . 123.23(12) ?
C3 C4 C5 . . 108.74(12) ?
C3 C4 H4 . . 125.6 ?
C5 C4 H4 . . 125.6 ?
C6 C5 C4 . . 129.27(13) ?
C6 C5 C1 . . 124.47(13) ?
C4 C5 C1 . . 106.00(11) ?
C5 C6 C19 . . 127.51(13) ?
C5 C6 H6 . . 116.2 ?
C19 C6 H6 . . 116.2 ?
C12 C7 C8 . . 117.95(13) ?
C12 C7 C1 . . 120.32(12) ?
C8 C7 C1 . . 121.69(13) ?
C9 C8 C7 . . 121.07(13) ?
C9 C8 H8 . . 119.5 ?
C7 C8 H8 . . 119.5 ?
C8 C9 C10 . . 120.36(13) ?
C8 C9 H9 . . 119.8 ?
C10 C9 H9 . . 119.8 ?
C9 C10 C11 . . 119.34(13) ?
C9 C10 H10 . . 120.3 ?
C11 C10 H10 . . 120.3 ?
C12 C11 C10 . . 120.45(14) ?
C12 C11 H11 . . 119.8 ?
C10 C11 H11 . . 119.8 ?
C11 C12 C7 . . 120.83(13) ?
C11 C12 H12 . . 119.6 ?
C7 C12 H12 . . 119.6 ?
C14 C13 C18 . . 118.25(13) ?
C14 C13 C3 . . 120.80(13) ?
C18 C13 C3 . . 120.85(13) ?
C15 C14 C13 . . 120.50(14) ?
C15 C14 H14 . . 119.7 ?
C13 C14 H14 . . 119.7 ?
C16 C15 C14 . . 120.54(15) ?
C16 C15 H15 . . 119.7 ?
C14 C15 H15 . . 119.7 ?
C15 C16 C17 . . 119.64(14) ?
C15 C16 H16 . . 120.2 ?
C17 C16 H16 . . 120.2 ?
C16 C17 C18 . . 120.26(15) ?
C16 C17 H17 . . 119.9 ?
C18 C17 H17 . . 119.9 ?
C17 C18 C13 . . 120.79(14) ?
C17 C18 H18 . . 119.6 ?
C13 C18 H18 . . 119.6 ?
C20 C19 C29 . . 119.06(13) ?
C20 C19 C6 . . 120.47(12) ?
C29 C19 C6 . . 120.35(12) ?
C21 C20 C19 . . 121.44(13) ?
C21 C20 H20 . . 119.3 ?
C19 C20 H20 . . 119.3 ?
C20 C21 C30 . . 121.09(13) ?
C20 C21 H21 . . 119.5 ?
C30 C21 H21 . . 119.5 ?
C23 C22 C30 . . 121.63(14) ?
C23 C22 H22 . . 119.2 ?
C30 C22 H22 . . 119.2 ?
C22 C23 C34 . . 121.20(14) ?
C22 C23 H23 . . 119.4 ?
C34 C23 H23 . . 119.4 ?
C25 C24 C34 . . 120.92(14) ?
C25 C24 H24 . . 119.5 ?
C34 C24 H24 . . 119.5 ?
C24 C25 C26 . . 120.47(14) ?
C24 C25 H25 . . 119.8 ?
C26 C25 H25 . . 119.8 ?
C25 C26 C33 . . 120.73(14) ?
C25 C26 H26 . . 119.6 ?
C33 C26 H26 . . 119.6 ?
C28 C27 C33 . . 121.98(14) ?
C28 C27 H27 . . 119.0 ?
C33 C27 H27 . . 119.0 ?
C27 C28 C29 . . 121.43(13) ?
C27 C28 H28 . . 119.3 ?
C29 C28 H28 . . 119.3 ?
C19 C29 C31 . . 119.37(12) ?
C19 C29 C28 . . 122.56(13) ?
C31 C29 C28 . . 118.03(12) ?
C21 C30 C31 . . 118.79(13) ?
C21 C30 C22 . . 122.56(13) ?
C31 C30 C22 . . 118.65(13) ?
C30 C31 C29 . . 120.23(12) ?
C30 C31 C32 . . 119.54(12) ?
C29 C31 C32 . . 120.23(12) ?
C33 C32 C34 . . 119.58(13) ?
C33 C32 C31 . . 120.15(12) ?
C34 C32 C31 . . 120.27(13) ?
C26 C33 C32 . . 119.33(13) ?
C26 C33 C27 . . 122.49(14) ?
C32 C33 C27 . . 118.17(13) ?
C24 C34 C32 . . 118.96(14) ?
C24 C34 C23 . . 122.33(14) ?
C32 C34 C23 . . 118.70(13) ?

loop_
_geom_torsion_atom_site_label_1
_geom_torsion_atom_site_label_2
_geom_torsion_atom_site_label_3
_geom_torsion_atom_site_label_4
_geom_torsion_site_symmetry_1
_geom_torsion_site_symmetry_2
_geom_torsion_site_symmetry_3
_geom_torsion_site_symmetry_4
_geom_torsion
_geom_torsion_publ_flag
C7 C1 C2 C3 . . . . -176.52(12) ?
C5 C1 C2 C3 . . . . 1.62(15) ?
C1 C2 C3 C4 . . . . -0.87(16) ?
C1 C2 C3 C13 . . . . 175.55(12) ?
C2 C3 C4 C5 . . . . -0.30(15) ?
C13 C3 C4 C5 . . . . -176.47(13) ?
C3 C4 C5 C6 . . . . -172.99(14) ?
C3 C4 C5 C1 . . . . 1.24(15) ?
C2 C1 C5 C6 . . . . 172.83(13) ?
C7 C1 C5 C6 . . . . -9.1(2) ?
C2 C1 C5 C4 . . . . -1.76(15) ?
C7 C1 C5 C4 . . . . 176.35(12) ?
C4 C5 C6 C19 . . . . -12.0(2) ?
C1 C5 C6 C19 . . . . 174.72(13) ?
C2 C1 C7 C12 . . . . -41.6(2) ?
C5 C1 C7 C12 . . . . 140.64(14) ?
C2 C1 C7 C8 . . . . 135.94(15) ?
C5 C1 C7 C8 . . . . -41.8(2) ?
C12 C7 C8 C9 . . . . 0.3(2) ?
C1 C7 C8 C9 . . . . -177.30(13) ?
C7 C8 C9 C10 . . . . -0.5(2) ?
C8 C9 C10 C11 . . . . 0.2(2) ?
C9 C10 C11 C12 . . . . 0.4(2) ?
C10 C11 C12 C7 . . . . -0.6(2) ?
C8 C7 C12 C11 . . . . 0.3(2) ?
C1 C7 C12 C11 . . . . 177.88(12) ?
C4 C3 C13 C14 . . . . -163.01(14) ?
C2 C3 C13 C14 . . . . 21.3(2) ?
C4 C3 C13 C18 . . . . 20.7(2) ?
C2 C3 C13 C18 . . . . -154.91(13) ?
C18 C13 C14 C15 . . . . 1.0(2) ?
C3 C13 C14 C15 . . . . -175.39(14) ?
C13 C14 C15 C16 . . . . 0.3(2) ?
C14 C15 C16 C17 . . . . -1.2(2) ?
C15 C16 C17 C18 . . . . 0.8(2) ?
C16 C17 C18 C13 . . . . 0.4(2) ?
C14 C13 C18 C17 . . . . -1.3(2) ?
C3 C13 C18 C17 . . . . 175.04(13) ?
C5 C6 C19 C20 . . . . -41.5(2) ?
C5 C6 C19 C29 . . . . 142.44(14) ?
C29 C19 C20 C21 . . . . 1.3(2) ?
C6 C19 C20 C21 . . . . -174.82(12) ?
C19 C20 C21 C30 . . . . -0.8(2) ?
C30 C22 C23 C34 . . . . -0.1(2) ?
C34 C24 C25 C26 . . . . -0.7(2) ?
C24 C25 C26 C33 . . . . 1.0(2) ?
C33 C27 C28 C29 . . . . 0.0(2) ?
C20 C19 C29 C31 . . . . -0.6(2) ?
C6 C19 C29 C31 . . . . 175.50(12) ?
C20 C19 C29 C28 . . . . 176.96(12) ?
C6 C19 C29 C28 . . . . -6.9(2) ?
C27 C28 C29 C19 . . . . -178.60(13) ?
C27 C28 C29 C31 . . . . -1.0(2) ?
C20 C21 C30 C31 . . . . -0.4(2) ?
C20 C21 C30 C22 . . . . 179.96(13) ?
C23 C22 C30 C21 . . . . 178.77(14) ?
C23 C22 C30 C31 . . . . -0.8(2) ?
C21 C30 C31 C29 . . . . 1.1(2) ?
C22 C30 C31 C29 . . . . -179.29(12) ?
C21 C30 C31 C32 . . . . -178.28(12) ?
C22 C30 C31 C32 . . . . 1.3(2) ?
C19 C29 C31 C30 . . . . -0.6(2) ?
C28 C29 C31 C30 . . . . -178.25(12) ?
C19 C29 C31 C32 . . . . 178.80(12) ?
C28 C29 C31 C32 . . . . 1.1(2) ?
C30 C31 C32 C33 . . . . 179.06(12) ?
C29 C31 C32 C33 . . . . -0.3(2) ?
C30 C31 C32 C34 . . . . -0.9(2) ?
C29 C31 C32 C34 . . . . 179.70(12) ?
C25 C26 C33 C32 . . . . -0.1(2) ?
C25 C26 C33 C27 . . . . 179.50(14) ?
C34 C32 C33 C26 . . . . -1.0(2) ?
C31 C32 C33 C26 . . . . 179.03(13) ?
C34 C32 C33 C27 . . . . 179.35(13) ?
C31 C32 C33 C27 . . . . -0.6(2) ?
C28 C27 C33 C26 . . . . -178.87(14) ?
C28 C27 C33 C32 . . . . 0.8(2) ?
C25 C24 C34 C32 . . . . -0.5(2) ?
C25 C24 C34 C23 . . . . -179.12(14) ?
C33 C32 C34 C24 . . . . 1.3(2) ?
C31 C32 C34 C24 . . . . -178.74(12) ?
C33 C32 C34 C23 . . . . 180.00(13) ?
C31 C32 C34 C23 . . . . 0.0(2) ?
C22 C23 C34 C24 . . . . 179.22(14) ?
C22 C23 C34 C32 . . . . 0.6(2) ?


#######################################################################
#
#                 Cambridge Crystallographic Data Centre
#                                CCDC 
# 
#######################################################################
# 
#  This CIF contains data from an original supplementary publication 
#  deposited with the CCDC, and may include chemical, crystal,   
#  experimental, refinement, atomic coordinates, 
#  anisotropic displacement parameters and molecular geometry data,
#  as required by the journal to which it was submitted. 
# 
#  This CIF is provided on the understanding that it is used for bona
#  fide research purposes only. It may contain copyright material 
#  of the CCDC or of third parties, and may not be copied or further 
#  disseminated in any form, whether machine-readable or not,  
#  except for the purpose of generating routine backup copies 
#  on your local computer system.
# 
#  For further information on the CCDC, data deposition and 
#  data retrieval see:
#                         www.ccdc.cam.ac.uk 
#
#  Bona fide researchers may freely download Mercury and enCIFer
#  from this site to visualise CIF-encoded structures and 
#  to carry out CIF format checking respectively. 
#
####################################################################### 

data_compound_6
_database_code_depnum_ccdc_archive 'CCDC 862048'
#TrackingRef '8999_web_deposit_cif_file_0_GaryJ.Balaich_1326211734.TFF1.cif'

_audit_creation_method           'APEX2 v2009.7-0'

_chemical_name_systematic        1,3,6-triphenylfulvene
_chemical_name_common            1,3,6-triphenylfulvene
_chemical_formula_moiety         'C24 H18'
_chemical_formula_sum            'C24 H18'
_chemical_formula_iupac          'C24 H18'
_chemical_formula_weight         306.38
_chemical_melting_point          ?

_symmetry_cell_setting           monoclinic
_symmetry_space_group_name_H-M   'P 1 21/c 1'
_symmetry_space_group_name_Hall  '-P 2ybc'
loop_
_symmetry_equiv_pos_as_xyz
'x, y, z'
'-x, y+1/2, -z+1/2'
'-x, -y, -z'
'x, -y-1/2, z-1/2'

_cell_length_a                   17.449(6)
_cell_length_b                   5.698(2)
_cell_length_c                   16.787(6)
_cell_angle_alpha                90
_cell_angle_beta                 99.761(4)
_cell_angle_gamma                90
_cell_volume                     1644.9(10)
_cell_formula_units_Z            4
_cell_measurement_reflns_used    6255
_cell_measurement_theta_min      2.3688
_cell_measurement_theta_max      29.3518
_cell_measurement_temperature    100.(2)

_exptl_crystal_description       'rectangular prism'
_exptl_crystal_colour            red
_exptl_crystal_size_max          0.36
_exptl_crystal_size_mid          0.29
_exptl_crystal_size_min          0.12
_exptl_crystal_density_diffrn    1.237
_exptl_crystal_density_meas      ?
_exptl_crystal_density_method    'not measured'
_exptl_crystal_F_000             648

_exptl_absorpt_coefficient_mu    0.070
_exptl_absorpt_correction_type   multi-scan
_exptl_absorpt_process_details   'Bruker SADABS, Version 2008/1'
_exptl_absorpt_correction_T_min  0.89
_exptl_absorpt_correction_T_max  0.99

_exptl_special_details           
;
;

_diffrn_ambient_temperature      100.(2)

_diffrn_radiation_type           MoK\a
_diffrn_radiation_wavelength     0.71073
_diffrn_radiation_source         'fine-focus sealed tube'
_diffrn_radiation_monochromator  graphite

_diffrn_measurement_device_type  'Bruker SMART APEX CCD'
_diffrn_measurement_method       'phi and omega scans'

_diffrn_detector_area_resol_mean 8.3660

_diffrn_reflns_number            15993
_diffrn_reflns_av_R_equivalents  0.0289
_diffrn_reflns_av_sigmaI/netI    0.0253
_diffrn_reflns_theta_min         2.37
_diffrn_reflns_theta_max         27.48
_diffrn_reflns_theta_full        27.48
_diffrn_measured_fraction_theta_max 1.000
_diffrn_measured_fraction_theta_full 1.000
_diffrn_reflns_limit_h_min       -22
_diffrn_reflns_limit_h_max       22
_diffrn_reflns_limit_k_min       -7
_diffrn_reflns_limit_k_max       7
_diffrn_reflns_limit_l_min       -21
_diffrn_reflns_limit_l_max       21

_refine_special_details          
;
Refinement of F^2^ against ALL reflections. The weighted R-factor wR and
goodness of fit S are based on F^2^, conventional R-factors R are based
on F, with F set to zero for negative F^2^. The threshold expression of
F^2^ > 2sigma(F^2^) is used only for calculating R-factors(gt) etc. and is
not relevant to the choice of reflections for refinement. R-factors based
on F^2^ are statistically about twice as large as those based on F, and R-
factors based on ALL data will be even larger.
;

_reflns_number_total             3772
_reflns_number_gt                3342
_reflns_threshold_expression     >2sigma(I)

_refine_ls_structure_factor_coef Fsqd
_refine_ls_matrix_type           full
_refine_ls_R_factor_all          0.0465
_refine_ls_R_factor_gt           0.0414
_refine_ls_wR_factor_gt          0.1047
_refine_ls_wR_factor_ref         0.1085
_refine_ls_goodness_of_fit_ref   1.032
_refine_ls_restrained_S_all      1.032
_refine_ls_number_reflns         3772
_refine_ls_number_parameters     217
_refine_ls_number_restraints     0
_refine_ls_hydrogen_treatment    constr
_refine_ls_weighting_scheme      calc
_refine_ls_weighting_details     
'calc w=1/[\s^2^(Fo^2^)+(0.0524P)^2^+0.5700P] where P=(Fo^2^+2Fc^2^)/3'

_atom_sites_solution_hydrogens   geom
_atom_sites_solution_primary     direct
_atom_sites_solution_secondary   difmap

_refine_ls_shift/su_max          0.000
_refine_ls_shift/su_mean         0.000
_refine_diff_density_max         0.334
_refine_diff_density_min         -0.162
_refine_ls_extinction_method     none
_refine_ls_extinction_coef       ?

loop_
_atom_type_symbol
_atom_type_description
_atom_type_scat_dispersion_real
_atom_type_scat_dispersion_imag
_atom_type_scat_source
C C 0.0033 0.0016 'International Tables Vol C Tables 4.2.6.8 and 6.1.1.4'
H H 0.0000 0.0000 'International Tables Vol C Tables 4.2.6.8 and 6.1.1.4'

_computing_data_collection       'Bruker SMART APEX'
_computing_cell_refinement       'SAINT V7.66A (Bruker AXS, 2009)'
_computing_data_reduction        'SAINT V7.66A (Bruker AXS, 2009)'
_computing_structure_solution    'SHELXS-97 (Sheldrick, 2008)'
_computing_structure_refinement  'SHELXL-97 (Sheldrick, 2008)'
_computing_molecular_graphics    'Bruker SHELXTL'
_computing_publication_material  'Bruker SHELXTL'

loop_
_atom_site_type_symbol
_atom_site_label
_atom_site_fract_x
_atom_site_fract_y
_atom_site_fract_z
_atom_site_U_iso_or_equiv
_atom_site_adp_type
_atom_site_calc_flag
_atom_site_refinement_flags
_atom_site_occupancy
_atom_site_disorder_assembly
_atom_site_disorder_group
C C1 0.27015(6) 0.0405(2) 0.06840(6) 0.0227(2) Uani d . 1 . .
C C2 0.33587(6) 0.0240(2) 0.12419(6) 0.0236(2) Uani d . 1 . .
H H2 0.3785 -0.0765 0.1201 0.028 Uiso calc R 1 . .
C C3 0.33162(6) 0.1838(2) 0.19174(6) 0.0224(2) Uani d . 1 . .
C C4 0.26302(6) 0.3020(2) 0.17520(6) 0.0231(2) Uani d . 1 . .
H H4 0.2464 0.4213 0.2079 0.028 Uiso calc R 1 . .
C C5 0.21917(6) 0.2159(2) 0.09899(6) 0.0229(2) Uani d . 1 . .
C C6 0.14359(6) 0.2590(2) 0.06841(6) 0.0237(2) Uani d . 1 . .
H H6 0.1214 0.1703 0.0223 0.028 Uiso calc R 1 . .
C C7 0.25479(6) -0.0900(2) -0.00834(6) 0.0221(2) Uani d . 1 . .
C C8 0.20881(6) -0.0003(2) -0.07810(6) 0.0238(2) Uani d . 1 . .
H H8 0.1843 0.1479 -0.0761 0.029 Uiso calc R 1 . .
C C9 0.19861(6) -0.1248(2) -0.15010(6) 0.0271(2) Uani d . 1 . .
H H9 0.1658 -0.0636 -0.1964 0.033 Uiso calc R 1 . .
C C10 0.23590(6) -0.3375(2) -0.15509(6) 0.0292(2) Uani d . 1 . .
H H10 0.2299 -0.42 -0.2049 0.035 Uiso calc R 1 . .
C C11 0.28207(6) -0.4294(2) -0.08676(8) 0.0288(2) Uani d . 1 . .
H H11 0.3082 -0.5745 -0.0899 0.035 Uiso calc R 1 . .
C C12 0.29015(6) -0.3092(2) -0.01382(6) 0.0254(2) Uani d . 1 . .
H H12 0.3201 -0.3766 0.0331 0.031 Uiso calc R 1 . .
C C13 0.38919(6) 0.1946(2) 0.26625(6) 0.0211(2) Uani d . 1 . .
C C14 0.44250(6) 0.0119(2) 0.28713(6) 0.0230(2) Uani d . 1 . .
H H14 0.4442 -0.1147 0.2507 0.028 Uiso calc R 1 . .
C C15 0.49291(6) 0.0142(2) 0.36067(6) 0.0252(2) Uani d . 1 . .
H H15 0.5287 -0.1111 0.3742 0.03 Uiso calc R 1 . .
C C16 0.49125(6) 0.1982(2) 0.41431(6) 0.0258(2) Uani d . 1 . .
H H16 0.525 0.1977 0.4651 0.031 Uiso calc R 1 . .
C C17 0.43994(6) 0.3839(2) 0.39353(6) 0.0270(2) Uani d . 1 . .
H H17 0.4394 0.5117 0.4298 0.032 Uiso calc R 1 . .
C C18 0.38977(6) 0.3833(2) 0.32032(6) 0.0245(2) Uani d . 1 . .
H H18 0.3553 0.5116 0.3064 0.029 Uiso calc R 1 . .
C C19 0.09236(6) 0.4286(2) 0.09920(6) 0.0232(2) Uani d . 1 . .
C C20 0.11883(6) 0.6447(2) 0.13295(6) 0.0252(2) Uani d . 1 . .
H H20 0.1716 0.6887 0.1345 0.03 Uiso calc R 1 . .
C C21 0.06894(6) 0.7950(2) 0.16406(6) 0.0291(2) Uani d . 1 . .
H H21 0.0878 0.9403 0.1873 0.035 Uiso calc R 1 . .
C C22 -0.00846(6) 0.7340(2) 0.16133(8) 0.0325(2) Uani d . 1 . .
H H22 -0.0422 0.835 0.1841 0.039 Uiso calc R 1 . .
C C23 -0.03633(6) 0.5247(2) 0.12516(8) 0.0319(2) Uani d . 1 . .
H H23 -0.0896 0.4844 0.122 0.038 Uiso calc R 1 . .
C C24 0.01335(6) 0.3747(2) 0.09372(6) 0.0276(2) Uani d . 1 . .
H H24 -0.0064 0.2333 0.0681 0.033 Uiso calc R 1 . .

loop_
_atom_site_aniso_label
_atom_site_aniso_U_11
_atom_site_aniso_U_22
_atom_site_aniso_U_33
_atom_site_aniso_U_12
_atom_site_aniso_U_13
_atom_site_aniso_U_23
C1 0.0221(5) 0.0207(5) 0.0263(5) 0.0002(4) 0.0069(4) -0.0004(4)
C2 0.0209(5) 0.0225(5) 0.0281(5) 0.0016(4) 0.0064(4) -0.0013(4)
C3 0.0218(5) 0.0207(5) 0.0254(5) 0.0000(4) 0.0063(4) 0.0011(4)
C4 0.0244(5) 0.0218(5) 0.0238(5) 0.0025(4) 0.0057(4) 0.0004(4)
C5 0.0238(5) 0.0216(5) 0.0240(5) 0.0008(4) 0.0062(4) 0.0013(4)
C6 0.0234(5) 0.0246(5) 0.0231(5) 0.0005(4) 0.0036(4) 0.0018(4)
C7 0.0186(5) 0.0221(5) 0.0270(5) -0.0029(4) 0.0076(4) -0.0025(4)
C8 0.0210(5) 0.0237(5) 0.0278(5) -0.0021(4) 0.0070(4) -0.0006(4)
C9 0.0228(5) 0.0321(5) 0.0271(5) -0.0050(5) 0.0065(4) -0.0017(5)
C10 0.0260(5) 0.0329(5) 0.0307(5) -0.0082(5) 0.0101(5) -0.0111(5)
C11 0.0246(5) 0.0222(5) 0.0418(7) -0.0031(5) 0.0118(5) -0.0075(5)
C12 0.0207(5) 0.0237(5) 0.0324(5) -0.0014(4) 0.0058(4) -0.0010(5)
C13 0.0182(5) 0.0214(5) 0.0246(5) -0.0015(4) 0.0059(4) 0.0018(4)
C14 0.0225(5) 0.0215(5) 0.0254(5) 0.0004(4) 0.0054(4) -0.0009(4)
C15 0.0226(5) 0.0241(5) 0.0284(5) 0.0016(4) 0.0034(4) 0.0032(4)
C16 0.0229(5) 0.0287(5) 0.0251(5) -0.0052(5) 0.0019(4) 0.0005(4)
C17 0.0256(5) 0.0254(5) 0.0304(5) -0.0043(5) 0.0059(5) -0.0061(5)
C18 0.0212(5) 0.0202(5) 0.0328(5) 0.0007(4) 0.0065(4) 0.0001(4)
C19 0.0224(5) 0.0268(5) 0.0205(5) 0.0045(4) 0.0037(4) 0.0054(4)
C20 0.0223(5) 0.0273(5) 0.0254(5) 0.0038(4) 0.0028(4) 0.0054(4)
C21 0.0328(5) 0.0263(5) 0.0275(5) 0.0074(5) 0.0027(5) 0.0033(5)
C22 0.0318(5) 0.0350(7) 0.0329(5) 0.0145(5) 0.0121(5) 0.0083(5)
C23 0.0221(5) 0.0363(7) 0.0390(7) 0.0053(5) 0.0096(5) 0.0131(5)
C24 0.0243(5) 0.0272(5) 0.0306(5) 0.0024(5) 0.0030(4) 0.0069(5)

_geom_special_details            
;
All esds (except the esd in the dihedral angle between two l.s. planes)
are estimated using the full covariance matrix. The cell esds are taken
into account individually in the estimation of esds in distances, angles
and torsion angles; correlations between esds in cell parameters are only
used when they are defined by crystal symmetry. An approximate (isotropic)
treatment of cell esds is used for estimating esds involving l.s. planes.
;

loop_
_geom_bond_atom_site_label_1
_geom_bond_atom_site_label_2
_geom_bond_site_symmetry_2
_geom_bond_distance
_geom_bond_publ_flag
C1 C2 . 1.3553(16) ?
C1 C7 . 1.4723(16) ?
C1 C5 . 1.4860(15) ?
C2 C3 . 1.4660(16) ?
C2 H2 . 0.95 ?
C3 C4 . 1.3603(16) ?
C3 C13 . 1.4668(16) ?
C4 C5 . 1.4599(16) ?
C4 H4 . 0.95 ?
C5 C6 . 1.3540(16) ?
C6 C19 . 1.4688(16) ?
C6 H6 . 0.95 ?
C7 C8 . 1.3991(16) ?
C7 C12 . 1.4031(17) ?
C8 C9 . 1.3867(17) ?
C8 H8 . 0.95 ?
C9 C10 . 1.3849(18) ?
C9 H9 . 0.95 ?
C10 C11 . 1.388(2) ?
C10 H10 . 0.95 ?
C11 C12 . 1.3890(17) ?
C11 H11 . 0.95 ?
C12 H12 . 0.95 ?
C13 C14 . 1.4004(16) ?
C13 C18 . 1.4056(16) ?
C14 C15 . 1.3891(16) ?
C14 H14 . 0.95 ?
C15 C16 . 1.3858(17) ?
C15 H15 . 0.95 ?
C16 C17 . 1.3918(17) ?
C16 H16 . 0.95 ?
C17 C18 . 1.3827(17) ?
C17 H17 . 0.95 ?
C18 H18 . 0.95 ?
C19 C24 . 1.4001(17) ?
C19 C20 . 1.4007(17) ?
C20 C21 . 1.3848(17) ?
C20 H20 . 0.95 ?
C21 C22 . 1.388(2) ?
C21 H21 . 0.95 ?
C22 C23 . 1.388(2) ?
C22 H22 . 0.95 ?
C23 C24 . 1.3842(18) ?
C23 H23 . 0.95 ?
C24 H24 . 0.95 ?

loop_
_geom_angle_atom_site_label_1
_geom_angle_atom_site_label_2
_geom_angle_atom_site_label_3
_geom_angle_site_symmetry_1
_geom_angle_site_symmetry_3
_geom_angle
_geom_angle_publ_flag
C2 C1 C7 . . 125.22(10) ?
C2 C1 C5 . . 107.09(10) ?
C7 C1 C5 . . 127.68(10) ?
C1 C2 C3 . . 110.09(10) ?
C1 C2 H2 . . 125.0 ?
C3 C2 H2 . . 125.0 ?
C4 C3 C2 . . 107.93(10) ?
C4 C3 C13 . . 127.22(10) ?
C2 C3 C13 . . 124.65(10) ?
C3 C4 C5 . . 108.95(10) ?
C3 C4 H4 . . 125.5 ?
C5 C4 H4 . . 125.5 ?
C6 C5 C4 . . 127.12(10) ?
C6 C5 C1 . . 126.33(11) ?
C4 C5 C1 . . 105.86(9) ?
C5 C6 C19 . . 126.70(11) ?
C5 C6 H6 . . 116.7 ?
C19 C6 H6 . . 116.7 ?
C8 C7 C12 . . 117.80(10) ?
C8 C7 C1 . . 122.77(11) ?
C12 C7 C1 . . 119.36(10) ?
C9 C8 C7 . . 120.89(11) ?
C9 C8 H8 . . 119.6 ?
C7 C8 H8 . . 119.6 ?
C10 C9 C8 . . 120.54(11) ?
C10 C9 H9 . . 119.7 ?
C8 C9 H9 . . 119.7 ?
C9 C10 C11 . . 119.54(11) ?
C9 C10 H10 . . 120.2 ?
C11 C10 H10 . . 120.2 ?
C10 C11 C12 . . 120.05(11) ?
C10 C11 H11 . . 120.0 ?
C12 C11 H11 . . 120.0 ?
C11 C12 C7 . . 121.10(11) ?
C11 C12 H12 . . 119.5 ?
C7 C12 H12 . . 119.4 ?
C14 C13 C18 . . 118.36(10) ?
C14 C13 C3 . . 120.79(10) ?
C18 C13 C3 . . 120.78(10) ?
C15 C14 C13 . . 120.62(11) ?
C15 C14 H14 . . 119.7 ?
C13 C14 H14 . . 119.7 ?
C16 C15 C14 . . 120.30(11) ?
C16 C15 H15 . . 119.9 ?
C14 C15 H15 . . 119.9 ?
C15 C16 C17 . . 119.73(11) ?
C15 C16 H16 . . 120.1 ?
C17 C16 H16 . . 120.1 ?
C18 C17 C16 . . 120.27(11) ?
C18 C17 H17 . . 119.9 ?
C16 C17 H17 . . 119.9 ?
C17 C18 C13 . . 120.68(11) ?
C17 C18 H18 . . 119.7 ?
C13 C18 H18 . . 119.7 ?
C24 C19 C20 . . 118.23(11) ?
C24 C19 C6 . . 118.93(11) ?
C20 C19 C6 . . 122.84(11) ?
C21 C20 C19 . . 120.72(11) ?
C21 C20 H20 . . 119.6 ?
C19 C20 H20 . . 119.6 ?
C20 C21 C22 . . 120.20(12) ?
C20 C21 H21 . . 119.9 ?
C22 C21 H21 . . 119.9 ?
C21 C22 C23 . . 119.78(11) ?
C21 C22 H22 . . 120.1 ?
C23 C22 H22 . . 120.1 ?
C24 C23 C22 . . 120.10(12) ?
C24 C23 H23 . . 119.9 ?
C22 C23 H23 . . 119.9 ?
C23 C24 C19 . . 120.85(12) ?
C23 C24 H24 . . 119.6 ?
C19 C24 H24 . . 119.6 ?

loop_
_geom_torsion_atom_site_label_1
_geom_torsion_atom_site_label_2
_geom_torsion_atom_site_label_3
_geom_torsion_atom_site_label_4
_geom_torsion_site_symmetry_1
_geom_torsion_site_symmetry_2
_geom_torsion_site_symmetry_3
_geom_torsion_site_symmetry_4
_geom_torsion
_geom_torsion_publ_flag
C7 C1 C2 C3 . . . . 178.48(10) ?
C5 C1 C2 C3 . . . . -0.37(13) ?
C1 C2 C3 C4 . . . . -1.45(13) ?
C1 C2 C3 C13 . . . . 173.74(10) ?
C2 C3 C4 C5 . . . . 2.66(13) ?
C13 C3 C4 C5 . . . . -172.37(10) ?
C3 C4 C5 C6 . . . . 168.05(12) ?
C3 C4 C5 C1 . . . . -2.86(12) ?
C2 C1 C5 C6 . . . . -169.08(11) ?
C7 C1 C5 C6 . . . . 12.1(2) ?
C2 C1 C5 C4 . . . . 1.92(12) ?
C7 C1 C5 C4 . . . . -176.90(11) ?
C4 C5 C6 C19 . . . . 9.6(2) ?
C1 C5 C6 C19 . . . . 178.71(11) ?
C2 C1 C7 C8 . . . . -149.11(12) ?
C5 C1 C7 C8 . . . . 29.51(17) ?
C2 C1 C7 C12 . . . . 27.90(17) ?
C5 C1 C7 C12 . . . . -153.48(11) ?
C12 C7 C8 C9 . . . . 0.09(16) ?
C1 C7 C8 C9 . . . . 177.14(10) ?
C7 C8 C9 C10 . . . . -2.12(17) ?
C8 C9 C10 C11 . . . . 1.79(17) ?
C9 C10 C11 C12 . . . . 0.56(17) ?
C10 C11 C12 C7 . . . . -2.63(17) ?
C8 C7 C12 C11 . . . . 2.28(16) ?
C1 C7 C12 C11 . . . . -174.88(10) ?
C4 C3 C13 C14 . . . . 157.83(12) ?
C2 C3 C13 C14 . . . . -16.42(16) ?
C4 C3 C13 C18 . . . . -19.10(17) ?
C2 C3 C13 C18 . . . . 166.65(11) ?
C18 C13 C14 C15 . . . . 2.02(16) ?
C3 C13 C14 C15 . . . . -174.99(10) ?
C13 C14 C15 C16 . . . . -0.24(17) ?
C14 C15 C16 C17 . . . . -1.37(17) ?
C15 C16 C17 C18 . . . . 1.15(17) ?
C16 C17 C18 C13 . . . . 0.68(17) ?
C14 C13 C18 C17 . . . . -2.24(16) ?
C3 C13 C18 C17 . . . . 174.77(10) ?
C5 C6 C19 C24 . . . . -145.87(12) ?
C5 C6 C19 C20 . . . . 35.08(18) ?
C24 C19 C20 C21 . . . . 3.48(16) ?
C6 C19 C20 C21 . . . . -177.47(10) ?
C19 C20 C21 C22 . . . . -0.70(17) ?
C20 C21 C22 C23 . . . . -1.89(18) ?
C21 C22 C23 C24 . . . . 1.61(18) ?
C22 C23 C24 C19 . . . . 1.26(18) ?
C20 C19 C24 C23 . . . . -3.77(17) ?
C6 C19 C24 C23 . . . . 177.14(11) ?


#######################################################################
#
#                 Cambridge Crystallographic Data Centre
#                                CCDC 
# 
#######################################################################
# 
#  This CIF contains data from an original supplementary publication 
#  deposited with the CCDC, and may include chemical, crystal,   
#  experimental, refinement, atomic coordinates, 
#  anisotropic displacement parameters and molecular geometry data,
#  as required by the journal to which it was submitted. 
# 
#  This CIF is provided on the understanding that it is used for bona
#  fide research purposes only. It may contain copyright material 
#  of the CCDC or of third parties, and may not be copied or further 
#  disseminated in any form, whether machine-readable or not,  
#  except for the purpose of generating routine backup copies 
#  on your local computer system.
# 
#  For further information on the CCDC, data deposition and 
#  data retrieval see:
#                         www.ccdc.cam.ac.uk 
#
#  Bona fide researchers may freely download Mercury and enCIFer
#  from this site to visualise CIF-encoded structures and 
#  to carry out CIF format checking respectively. 
#
####################################################################### 

data_compound_8
_database_code_depnum_ccdc_archive 'CCDC 863184'
#TrackingRef '9072_web_deposit_cif_file_0_GaryJ.Balaich_1326752411.dmp.cif'

_audit_creation_method           'APEX2 v2009.7-0'

_chemical_name_systematic        6-(3,5-dimethoxyphenyl)-1,3-diphenylfulvene
_chemical_name_common            6-(3,5-dimethoxyphenyl)-1,3-diphenylfulvene
_chemical_formula_moiety         'C26 H22 O2'
_chemical_formula_sum            'C26 H22 O2'
_chemical_formula_iupac          'C26 H22 O2'
_chemical_formula_weight         366.44
_chemical_melting_point          ?

_symmetry_cell_setting           triclinic
_symmetry_space_group_name_H-M   'P -1'
_symmetry_space_group_name_Hall  '-P 1'
loop_
_symmetry_equiv_pos_as_xyz
'x, y, z'
'-x, -y, -z'

_cell_length_a                   8.1770(18)
_cell_length_b                   8.7726(18)
_cell_length_c                   14.965(4)
_cell_angle_alpha                104.847(3)
_cell_angle_beta                 90.349(3)
_cell_angle_gamma                109.606(2)
_cell_volume                     972.5(4)
_cell_formula_units_Z            2
_cell_measurement_reflns_used    6497
_cell_measurement_theta_min      2.3878
_cell_measurement_theta_max      29.4602
_cell_measurement_temperature    100.(2)

_exptl_crystal_description       prism
_exptl_crystal_colour            'dark red'
_exptl_crystal_size_max          0.40
_exptl_crystal_size_mid          0.39
_exptl_crystal_size_min          0.15
_exptl_crystal_density_diffrn    1.251
_exptl_crystal_density_meas      ?
_exptl_crystal_density_method    'not measured'
_exptl_crystal_F_000             388

_exptl_absorpt_coefficient_mu    0.078
_exptl_absorpt_correction_type   multi-scan
_exptl_absorpt_process_details   'Bruker SADABS, Version 2008/1'
_exptl_absorpt_correction_T_min  0.90
_exptl_absorpt_correction_T_max  0.99

_exptl_special_details           
;
;

_diffrn_ambient_temperature      100.(2)

_diffrn_radiation_type           MoK\a
_diffrn_radiation_wavelength     0.71073
_diffrn_radiation_source         'fine-focus sealed tube'
_diffrn_radiation_monochromator  graphite

_diffrn_measurement_device_type  'Bruker SMART APEX CCD'
_diffrn_measurement_method       'phi and omega scans'

_diffrn_detector_area_resol_mean 8.3660

_diffrn_reflns_number            10663
_diffrn_reflns_av_R_equivalents  0.0169
_diffrn_reflns_av_sigmaI/netI    0.0218
_diffrn_reflns_theta_min         2.56
_diffrn_reflns_theta_max         28.28
_diffrn_reflns_theta_full        28.28
_diffrn_measured_fraction_theta_max 0.984
_diffrn_measured_fraction_theta_full 0.984
_diffrn_reflns_limit_h_min       -10
_diffrn_reflns_limit_h_max       10
_diffrn_reflns_limit_k_min       -11
_diffrn_reflns_limit_k_max       11
_diffrn_reflns_limit_l_min       -19
_diffrn_reflns_limit_l_max       19

_refine_special_details          
;
Refinement of F^2^ against ALL reflections. The weighted R-factor wR and
goodness of fit S are based on F^2^, conventional R-factors R are based
on F, with F set to zero for negative F^2^. The threshold expression of
F^2^ > 2sigma(F^2^) is used only for calculating R-factors(gt) etc. and is
not relevant to the choice of reflections for refinement. R-factors based
on F^2^ are statistically about twice as large as those based on F, and R-
factors based on ALL data will be even larger.
;

_reflns_number_total             4745
_reflns_number_gt                4391
_reflns_threshold_expression     >2sigma(I)

_refine_ls_structure_factor_coef Fsqd
_refine_ls_matrix_type           full
_refine_ls_R_factor_all          0.0454
_refine_ls_R_factor_gt           0.0425
_refine_ls_wR_factor_gt          0.1155
_refine_ls_wR_factor_ref         0.1187
_refine_ls_goodness_of_fit_ref   1.048
_refine_ls_restrained_S_all      1.048
_refine_ls_number_reflns         4745
_refine_ls_number_parameters     255
_refine_ls_number_restraints     0
_refine_ls_hydrogen_treatment    constr
_refine_ls_weighting_scheme      calc
_refine_ls_weighting_details     
'calc w=1/[\s^2^(Fo^2^)+(0.0682P)^2^+0.2835P] where P=(Fo^2^+2Fc^2^)/3'

_atom_sites_solution_hydrogens   geom
_atom_sites_solution_primary     direct
_atom_sites_solution_secondary   difmap

_refine_ls_shift/su_max          0.001
_refine_ls_shift/su_mean         0.000
_refine_diff_density_max         0.403
_refine_diff_density_min         -0.218
_refine_ls_extinction_method     none
_refine_ls_extinction_coef       ?

loop_
_atom_type_symbol
_atom_type_description
_atom_type_scat_dispersion_real
_atom_type_scat_dispersion_imag
_atom_type_scat_source
C C 0.0033 0.0016 'International Tables Vol C Tables 4.2.6.8 and 6.1.1.4'
H H 0.0000 0.0000 'International Tables Vol C Tables 4.2.6.8 and 6.1.1.4'
O O 0.0106 0.0060 'International Tables Vol C Tables 4.2.6.8 and 6.1.1.4'

_computing_data_collection       'Bruker SMART APEX'
_computing_cell_refinement       'SAINT V7.66A (Bruker AXS, 2009)'
_computing_data_reduction        'SAINT V7.66A (Bruker AXS, 2009)'
_computing_structure_solution    'SHELXS-97 (Sheldrick, 2008)'
_computing_structure_refinement  'SHELXL-97 (Sheldrick, 2008)'
_computing_molecular_graphics    'Bruker SHELXTL'
_computing_publication_material  'Bruker SHELXTL'

loop_
_atom_site_type_symbol
_atom_site_label
_atom_site_fract_x
_atom_site_fract_y
_atom_site_fract_z
_atom_site_U_iso_or_equiv
_atom_site_adp_type
_atom_site_calc_flag
_atom_site_refinement_flags
_atom_site_occupancy
_atom_site_disorder_assembly
_atom_site_disorder_group
O O1 0.19702(10) 1.24723(10) 1.06142(5) 0.02258(18) Uani d . 1 . .
O O2 0.77447(9) 1.31846(10) 0.98174(5) 0.02167(17) Uani d . 1 . .
C C1 0.05028(12) 0.58710(12) 0.69422(6) 0.0175(2) Uani d . 1 . .
C C2 -0.09823(13) 0.58023(12) 0.64946(6) 0.0189(2) Uani d . 1 . .
H H2 -0.1751 0.4844 0.6046 0.023 Uiso calc R 1 . .
C C3 -0.12153(12) 0.74436(12) 0.68122(6) 0.0180(2) Uani d . 1 . .
C C4 0.01137(12) 0.84806(12) 0.74709(6) 0.0185(2) Uani d . 1 . .
H H4 0.0257 0.9603 0.7804 0.022 Uiso calc R 1 . .
C C5 0.12829(12) 0.75885(12) 0.75820(6) 0.0175(2) Uani d . 1 . .
C C6 0.28428(12) 0.82205(12) 0.80980(6) 0.0176(2) Uani d . 1 . .
H H6 0.356 0.7548 0.7994 0.021 Uiso calc R 1 . .
C C7 0.11969(12) 0.45054(12) 0.68822(6) 0.0179(2) Uani d . 1 . .
C C8 0.18772(12) 0.43061(12) 0.76896(6) 0.0194(2) Uani d . 1 . .
H H8 0.1852 0.5035 0.8277 0.023 Uiso calc R 1 . .
C C9 0.25878(13) 0.30565(13) 0.76425(8) 0.0235(2) Uani d . 1 . .
H H9 0.3048 0.2939 0.8195 0.028 Uiso calc R 1 . .
C C10 0.26253(14) 0.19808(13) 0.67892(9) 0.0268(2) Uani d . 1 . .
H H10 0.3132 0.1141 0.6756 0.032 Uiso calc R 1 . .
C C11 0.19207(16) 0.21333(13) 0.59837(8) 0.0275(2) Uani d . 1 . .
H H11 0.1926 0.1384 0.54 0.033 Uiso calc R 1 . .
C C12 0.12060(14) 0.33818(12) 0.60290(6) 0.0224(2) Uani d . 1 . .
H H12 0.0719 0.3473 0.5475 0.027 Uiso calc R 1 . .
C C13 -0.26508(12) 0.78772(12) 0.64802(6) 0.0184(2) Uani d . 1 . .
C C14 -0.42570(13) 0.66405(13) 0.60896(6) 0.0209(2) Uani d . 1 . .
H H14 -0.4436 0.5493 0.6039 0.025 Uiso calc R 1 . .
C C15 -0.55947(13) 0.70765(14) 0.57745(6) 0.0232(2) Uani d . 1 . .
H H15 -0.6682 0.6225 0.5511 0.028 Uiso calc R 1 . .
C C16 -0.53559(14) 0.87410(14) 0.58410(6) 0.0248(2) Uani d . 1 . .
H H16 -0.6269 0.903 0.5617 0.03 Uiso calc R 1 . .
C C17 -0.37727(14) 0.99887(14) 0.62378(8) 0.0248(2) Uani d . 1 . .
H H17 -0.361 1.1134 0.6293 0.03 Uiso calc R 1 . .
C C18 -0.24302(13) 0.95663(12) 0.65536(6) 0.0214(2) Uani d . 1 . .
H H18 -0.1351 1.0426 0.6822 0.026 Uiso calc R 1 . .
C C19 0.35329(12) 0.98482(12) 0.88042(6) 0.0165(2) Uani d . 1 . .
C C20 0.24354(12) 1.04640(12) 0.93807(6) 0.0177(2) Uani d . 1 . .
H H20 0.1216 0.9856 0.9303 0.021 Uiso calc R 1 . .
C C21 0.31387(12) 1.19820(12) 1.00736(6) 0.0173(2) Uani d . 1 . .
C C22 0.49181(12) 1.28807(12) 1.01909(6) 0.0180(2) Uani d . 1 . .
H H22 0.5389 1.3926 1.0653 0.022 Uiso calc R 1 . .
C C23 0.60113(12) 1.22288(12) 0.96194(6) 0.0173(2) Uani d . 1 . .
C C24 0.53452(12) 1.07244(12) 0.89261(6) 0.0174(2) Uani d . 1 . .
H H24 0.6098 1.0294 0.8541 0.021 Uiso calc R 1 . .
C C25 0.26375(14) 1.40280(13) 1.13246(8) 0.0243(2) Uani d . 1 . .
H H25A 0.3451 1.3942 1.1777 0.036 Uiso calc R 1 . .
H H25B 0.167 1.4276 1.1638 0.036 Uiso calc R 1 . .
H H25C 0.3249 1.4933 1.1046 0.036 Uiso calc R 1 . .
C C26 0.89162(13) 1.26490(14) 0.92194(8) 0.0251(2) Uani d . 1 . .
H H26A 0.8853 1.1525 0.9245 0.038 Uiso calc R 1 . .
H H26B 1.0109 1.3442 0.9422 0.038 Uiso calc R 1 . .
H H26C 0.8591 1.2612 0.8581 0.038 Uiso calc R 1 . .

loop_
_atom_site_aniso_label
_atom_site_aniso_U_11
_atom_site_aniso_U_22
_atom_site_aniso_U_33
_atom_site_aniso_U_12
_atom_site_aniso_U_13
_atom_site_aniso_U_23
O1 0.0195(4) 0.0248(4) 0.0210(4) 0.0087(2) 0.0039(2) 0.0007(2)
O2 0.0152(4) 0.0222(4) 0.0232(4) 0.0033(2) 0.0010(2) 0.0032(2)
C1 0.0203(5) 0.0164(4) 0.0149(4) 0.0062(4) 0.0019(2) 0.0030(2)
C2 0.0221(5) 0.0176(5) 0.0156(4) 0.0066(4) 0.0005(4) 0.0027(2)
C3 0.0198(5) 0.0180(5) 0.0169(4) 0.0072(4) 0.0020(4) 0.0052(4)
C4 0.0210(5) 0.0167(4) 0.0179(4) 0.0074(4) 0.0012(4) 0.0039(4)
C5 0.0200(5) 0.0159(4) 0.0161(4) 0.0061(4) 0.0021(4) 0.0037(2)
C6 0.0188(5) 0.0167(5) 0.0179(4) 0.0070(4) 0.0027(4) 0.0046(4)
C7 0.0180(4) 0.0156(4) 0.0193(5) 0.0054(4) 0.0036(4) 0.0039(4)
C8 0.0197(5) 0.0171(5) 0.0197(5) 0.0052(4) 0.0024(4) 0.0042(4)
C9 0.0228(5) 0.0212(5) 0.0278(5) 0.0077(4) 0.0020(4) 0.0091(4)
C10 0.0280(5) 0.0209(5) 0.0357(5) 0.0127(4) 0.0103(5) 0.0092(4)
C11 0.0356(5) 0.0209(5) 0.0260(5) 0.0117(5) 0.0118(5) 0.0036(4)
C12 0.0286(5) 0.0193(5) 0.0184(5) 0.0081(4) 0.0047(4) 0.0037(4)
C13 0.0207(5) 0.0213(5) 0.0145(4) 0.0091(4) 0.0019(4) 0.0045(4)
C14 0.0229(5) 0.0217(5) 0.0180(5) 0.0080(4) 0.0008(4) 0.0049(4)
C15 0.0198(5) 0.0302(5) 0.0182(5) 0.0085(4) 0.0004(4) 0.0047(4)
C16 0.0257(5) 0.0342(5) 0.0201(5) 0.0181(5) 0.0021(4) 0.0064(4)
C17 0.0302(5) 0.0249(5) 0.0235(5) 0.0154(5) 0.0027(4) 0.0061(4)
C18 0.0236(5) 0.0209(5) 0.0197(5) 0.0090(4) 0.0007(4) 0.0040(4)
C19 0.0179(5) 0.0159(4) 0.0164(4) 0.0061(4) 0.0001(2) 0.0052(2)
C20 0.0158(4) 0.0190(5) 0.0184(4) 0.0058(4) 0.0006(2) 0.0059(4)
C21 0.0189(5) 0.0192(5) 0.0161(4) 0.0087(4) 0.0023(2) 0.0059(4)
C22 0.0194(5) 0.0170(4) 0.0167(4) 0.0058(4) -0.0003(4) 0.0040(4)
C23 0.0156(4) 0.0178(5) 0.0185(5) 0.0044(4) 0.0002(2) 0.0070(4)
C24 0.0174(5) 0.0182(5) 0.0179(4) 0.0074(4) 0.0022(2) 0.0054(4)
C25 0.0300(5) 0.0208(5) 0.0216(5) 0.0101(4) 0.0078(4) 0.0034(4)
C26 0.0160(5) 0.0292(5) 0.0276(5) 0.0057(4) 0.0036(4) 0.0063(4)

_geom_special_details            
;
All esds (except the esd in the dihedral angle between two l.s. planes)
are estimated using the full covariance matrix. The cell esds are taken
into account individually in the estimation of esds in distances, angles
and torsion angles; correlations between esds in cell parameters are only
used when they are defined by crystal symmetry. An approximate (isotropic)
treatment of cell esds is used for estimating esds involving l.s. planes.
;

loop_
_geom_bond_atom_site_label_1
_geom_bond_atom_site_label_2
_geom_bond_site_symmetry_2
_geom_bond_distance
_geom_bond_publ_flag
O1 C21 . 1.3636(11) ?
O1 C25 . 1.4283(13) ?
O2 C23 . 1.3674(11) ?
O2 C26 . 1.4269(13) ?
C1 C2 . 1.3592(14) ?
C1 C7 . 1.4721(14) ?
C1 C5 . 1.4839(14) ?
C2 C3 . 1.4730(14) ?
C2 H2 . 0.95 ?
C3 C4 . 1.3581(14) ?
C3 C13 . 1.4692(14) ?
C4 C5 . 1.4563(14) ?
C4 H4 . 0.95 ?
C5 C6 . 1.3508(14) ?
C6 C19 . 1.4672(14) ?
C6 H6 . 0.95 ?
C7 C12 . 1.4008(14) ?
C7 C8 . 1.4019(14) ?
C8 C9 . 1.3902(15) ?
C8 H8 . 0.95 ?
C9 C10 . 1.3872(16) ?
C9 H9 . 0.95 ?
C10 C11 . 1.3888(18) ?
C10 H10 . 0.95 ?
C11 C12 . 1.3920(16) ?
C11 H11 . 0.95 ?
C12 H12 . 0.95 ?
C13 C14 . 1.3976(15) ?
C13 C18 . 1.4062(15) ?
C14 C15 . 1.3900(15) ?
C14 H14 . 0.95 ?
C15 C16 . 1.3836(17) ?
C15 H15 . 0.95 ?
C16 C17 . 1.3904(17) ?
C16 H16 . 0.95 ?
C17 C18 . 1.3864(15) ?
C17 H17 . 0.95 ?
C18 H18 . 0.95 ?
C19 C20 . 1.3920(14) ?
C19 C24 . 1.4073(14) ?
C20 C21 . 1.3966(14) ?
C20 H20 . 0.95 ?
C21 C22 . 1.3876(14) ?
C22 C23 . 1.3998(14) ?
C22 H22 . 0.95 ?
C23 C24 . 1.3870(14) ?
C24 H24 . 0.95 ?
C25 H25A . 0.98 ?
C25 H25B . 0.98 ?
C25 H25C . 0.98 ?
C26 H26A . 0.98 ?
C26 H26B . 0.98 ?
C26 H26C . 0.98 ?

loop_
_geom_angle_atom_site_label_1
_geom_angle_atom_site_label_2
_geom_angle_atom_site_label_3
_geom_angle_site_symmetry_1
_geom_angle_site_symmetry_3
_geom_angle
_geom_angle_publ_flag
C21 O1 C25 . . 117.13(8) ?
C23 O2 C26 . . 117.02(8) ?
C2 C1 C7 . . 128.26(9) ?
C2 C1 C5 . . 107.21(9) ?
C7 C1 C5 . . 124.39(9) ?
C1 C2 C3 . . 109.44(9) ?
C1 C2 H2 . . 125.3 ?
C3 C2 H2 . . 125.3 ?
C4 C3 C13 . . 125.89(9) ?
C4 C3 C2 . . 108.29(9) ?
C13 C3 C2 . . 125.82(9) ?
C3 C4 C5 . . 108.77(9) ?
C3 C4 H4 . . 125.6 ?
C5 C4 H4 . . 125.6 ?
C6 C5 C4 . . 127.46(9) ?
C6 C5 C1 . . 126.07(9) ?
C4 C5 C1 . . 106.24(8) ?
C5 C6 C19 . . 126.10(9) ?
C5 C6 H6 . . 117.0 ?
C19 C6 H6 . . 117.0 ?
C12 C7 C8 . . 118.26(9) ?
C12 C7 C1 . . 121.59(9) ?
C8 C7 C1 . . 120.15(9) ?
C9 C8 C7 . . 120.89(10) ?
C9 C8 H8 . . 119.6 ?
C7 C8 H8 . . 119.6 ?
C10 C9 C8 . . 120.08(10) ?
C10 C9 H9 . . 120.0 ?
C8 C9 H9 . . 120.0 ?
C9 C10 C11 . . 119.87(10) ?
C9 C10 H10 . . 120.1 ?
C11 C10 H10 . . 120.1 ?
C10 C11 C12 . . 120.17(10) ?
C10 C11 H11 . . 119.9 ?
C12 C11 H11 . . 119.9 ?
C11 C12 C7 . . 120.70(10) ?
C11 C12 H12 . . 119.7 ?
C7 C12 H12 . . 119.7 ?
C14 C13 C18 . . 118.44(9) ?
C14 C13 C3 . . 121.42(9) ?
C18 C13 C3 . . 120.14(9) ?
C15 C14 C13 . . 120.51(10) ?
C15 C14 H14 . . 119.7 ?
C13 C14 H14 . . 119.7 ?
C16 C15 C14 . . 120.53(10) ?
C16 C15 H15 . . 119.7 ?
C14 C15 H15 . . 119.7 ?
C15 C16 C17 . . 119.68(10) ?
C15 C16 H16 . . 120.2 ?
C17 C16 H16 . . 120.2 ?
C18 C17 C16 . . 120.22(10) ?
C18 C17 H17 . . 119.9 ?
C16 C17 H17 . . 119.9 ?
C17 C18 C13 . . 120.62(10) ?
C17 C18 H18 . . 119.7 ?
C13 C18 H18 . . 119.7 ?
C20 C19 C24 . . 120.57(9) ?
C20 C19 C6 . . 120.79(9) ?
C24 C19 C6 . . 118.52(9) ?
C19 C20 C21 . . 119.57(9) ?
C19 C20 H20 . . 120.2 ?
C21 C20 H20 . . 120.2 ?
O1 C21 C22 . . 123.90(9) ?
O1 C21 C20 . . 115.47(9) ?
C22 C21 C20 . . 120.63(9) ?
C21 C22 C23 . . 119.20(9) ?
C21 C22 H22 . . 120.4 ?
C23 C22 H22 . . 120.4 ?
O2 C23 C24 . . 124.42(9) ?
O2 C23 C22 . . 114.30(9) ?
C24 C23 C22 . . 121.28(9) ?
C23 C24 C19 . . 118.73(9) ?
C23 C24 H24 . . 120.6 ?
C19 C24 H24 . . 120.6 ?
O1 C25 H25A . . 109.5 ?
O1 C25 H25B . . 109.5 ?
H25A C25 H25B . . 109.5 ?
O1 C25 H25C . . 109.5 ?
H25A C25 H25C . . 109.5 ?
H25B C25 H25C . . 109.5 ?
O2 C26 H26A . . 109.5 ?
O2 C26 H26B . . 109.5 ?
H26A C26 H26B . . 109.5 ?
O2 C26 H26C . . 109.5 ?
H26A C26 H26C . . 109.5 ?
H26B C26 H26C . . 109.5 ?

loop_
_geom_torsion_atom_site_label_1
_geom_torsion_atom_site_label_2
_geom_torsion_atom_site_label_3
_geom_torsion_atom_site_label_4
_geom_torsion_site_symmetry_1
_geom_torsion_site_symmetry_2
_geom_torsion_site_symmetry_3
_geom_torsion_site_symmetry_4
_geom_torsion
_geom_torsion_publ_flag
C7 C1 C2 C3 . . . . 176.31(10) ?
C5 C1 C2 C3 . . . . 0.51(11) ?
C1 C2 C3 C4 . . . . -1.64(12) ?
C1 C2 C3 C13 . . . . 178.99(10) ?
C13 C3 C4 C5 . . . . -178.57(9) ?
C2 C3 C4 C5 . . . . 2.06(12) ?
C3 C4 C5 C6 . . . . 172.98(10) ?
C3 C4 C5 C1 . . . . -1.75(11) ?
C2 C1 C5 C6 . . . . -174.11(10) ?
C7 C1 C5 C6 . . . . 9.88(16) ?
C2 C1 C5 C4 . . . . 0.71(11) ?
C7 C1 C5 C4 . . . . -175.30(9) ?
C4 C5 C6 C19 . . . . 13.31(17) ?
C1 C5 C6 C19 . . . . -172.96(9) ?
C2 C1 C7 C12 . . . . 43.52(16) ?
C5 C1 C7 C12 . . . . -141.34(11) ?
C2 C1 C7 C8 . . . . -136.72(11) ?
C5 C1 C7 C8 . . . . 38.42(15) ?
C12 C7 C8 C9 . . . . 1.81(16) ?
C1 C7 C8 C9 . . . . -177.96(10) ?
C7 C8 C9 C10 . . . . -0.25(17) ?
C8 C9 C10 C11 . . . . -1.25(17) ?
C9 C10 C11 C12 . . . . 1.16(18) ?
C10 C11 C12 C7 . . . . 0.44(17) ?
C8 C7 C12 C11 . . . . -1.90(16) ?
C1 C7 C12 C11 . . . . 177.87(10) ?
C4 C3 C13 C14 . . . . -155.28(11) ?
C2 C3 C13 C14 . . . . 23.98(16) ?
C4 C3 C13 C18 . . . . 24.54(16) ?
C2 C3 C13 C18 . . . . -156.20(10) ?
C18 C13 C14 C15 . . . . 0.57(15) ?
C3 C13 C14 C15 . . . . -179.60(9) ?
C13 C14 C15 C16 . . . . 0.13(16) ?
C14 C15 C16 C17 . . . . -0.88(16) ?
C15 C16 C17 C18 . . . . 0.92(17) ?
C16 C17 C18 C13 . . . . -0.21(16) ?
C14 C13 C18 C17 . . . . -0.53(15) ?
C3 C13 C18 C17 . . . . 179.64(10) ?
C5 C6 C19 C20 . . . . 37.02(15) ?
C5 C6 C19 C24 . . . . -146.97(10) ?
C24 C19 C20 C21 . . . . 1.29(14) ?
C6 C19 C20 C21 . . . . 177.23(9) ?
C25 O1 C21 C22 . . . . 1.61(14) ?
C25 O1 C21 C20 . . . . -179.37(9) ?
C19 C20 C21 O1 . . . . -178.96(8) ?
C19 C20 C21 C22 . . . . 0.09(15) ?
O1 C21 C22 C23 . . . . 177.51(9) ?
C20 C21 C22 C23 . . . . -1.47(15) ?
C26 O2 C23 C24 . . . . 5.01(14) ?
C26 O2 C23 C22 . . . . -175.84(9) ?
C21 C22 C23 O2 . . . . -177.69(8) ?
C21 C22 C23 C24 . . . . 1.49(15) ?
O2 C23 C24 C19 . . . . 178.96(9) ?
C22 C23 C24 C19 . . . . -0.13(14) ?
C20 C19 C24 C23 . . . . -1.27(14) ?
C6 C19 C24 C23 . . . . -177.30(9) ?


#######################################################################
#
#                 Cambridge Crystallographic Data Centre
#                                CCDC 
# 
#######################################################################
# 
#  This CIF contains data from an original supplementary publication 
#  deposited with the CCDC, and may include chemical, crystal,   
#  experimental, refinement, atomic coordinates, 
#  anisotropic displacement parameters and molecular geometry data,
#  as required by the journal to which it was submitted. 
# 
#  This CIF is provided on the understanding that it is used for bona
#  fide research purposes only. It may contain copyright material 
#  of the CCDC or of third parties, and may not be copied or further 
#  disseminated in any form, whether machine-readable or not,  
#  except for the purpose of generating routine backup copies 
#  on your local computer system.
# 
#  For further information on the CCDC, data deposition and 
#  data retrieval see:
#                         www.ccdc.cam.ac.uk 
#
#  Bona fide researchers may freely download Mercury and enCIFer
#  from this site to visualise CIF-encoded structures and 
#  to carry out CIF format checking respectively. 
#
####################################################################### 

data_compound_5
_database_code_depnum_ccdc_archive 'CCDC 863185'
#TrackingRef '9073_web_deposit_cif_file_0_GaryJ.Balaich_1326757847.6cy.cif'

_audit_creation_method           'APEX2 v2009.7-0'

_chemical_name_systematic        6-cyclohexyl-1,3-diphenylfulvene
_chemical_name_common            6-cyclohexyl-1,3-diphenylfulvene
_chemical_formula_moiety         'C24 H24'
_chemical_formula_sum            'C24 H24'
_chemical_formula_iupac          'C24 H24'
_chemical_formula_weight         312.43
_chemical_melting_point          ?

_symmetry_cell_setting           monoclinic
_symmetry_space_group_name_H-M   'C 1 2/c 1'
_symmetry_space_group_name_Hall  '-C 2yc'
loop_
_symmetry_equiv_pos_as_xyz
'x, y, z'
'-x, y, -z+1/2'
'x+1/2, y+1/2, z'
'-x+1/2, y+1/2, -z+1/2'
'-x, -y, -z'
'x, -y, z-1/2'
'-x+1/2, -y+1/2, -z'
'x+1/2, -y+1/2, z-1/2'

_cell_length_a                   21.841(3)
_cell_length_b                   6.1472(8)
_cell_length_c                   26.751(3)
_cell_angle_alpha                90
_cell_angle_beta                 93.188(2)
_cell_angle_gamma                90
_cell_volume                     3586.1(8)
_cell_formula_units_Z            8
_cell_measurement_reflns_used    4746
_cell_measurement_theta_min      2.3447
_cell_measurement_theta_max      27.6749
_cell_measurement_temperature    100.(2)

_exptl_crystal_description       'rectangular block'
_exptl_crystal_colour            orange
_exptl_crystal_size_max          0.48
_exptl_crystal_size_mid          0.20
_exptl_crystal_size_min          0.16
_exptl_crystal_density_diffrn    1.157
_exptl_crystal_density_meas      ?
_exptl_crystal_density_method    'not measured'
_exptl_crystal_F_000             1344

_exptl_absorpt_coefficient_mu    0.065
_exptl_absorpt_correction_type   multi-scan
_exptl_absorpt_process_details   'Bruker SADABS, Version 2008/1'
_exptl_absorpt_correction_T_min  0.82
_exptl_absorpt_correction_T_max  0.99

_exptl_special_details           
;
;

_diffrn_ambient_temperature      100.(2)

_diffrn_radiation_type           MoK\a
_diffrn_radiation_wavelength     0.71073
_diffrn_radiation_source         'fine-focus sealed tube'
_diffrn_radiation_monochromator  graphite

_diffrn_measurement_device_type  'Bruker SMART APEX CCD'
_diffrn_measurement_method       'phi and omega scans'

_diffrn_detector_area_resol_mean 8.3333

_diffrn_reflns_number            17871
_diffrn_reflns_av_R_equivalents  0.0290
_diffrn_reflns_av_sigmaI/netI    0.0272
_diffrn_reflns_theta_min         2.34
_diffrn_reflns_theta_max         27.83
_diffrn_reflns_theta_full        27.83
_diffrn_measured_fraction_theta_max 0.997
_diffrn_measured_fraction_theta_full 0.997
_diffrn_reflns_limit_h_min       -28
_diffrn_reflns_limit_h_max       28
_diffrn_reflns_limit_k_min       -8
_diffrn_reflns_limit_k_max       8
_diffrn_reflns_limit_l_min       -35
_diffrn_reflns_limit_l_max       35

_refine_special_details          
;
Refinement of F^2^ against ALL reflections. The weighted R-factor wR and
goodness of fit S are based on F^2^, conventional R-factors R are based
on F, with F set to zero for negative F^2^. The threshold expression of
F^2^ > 2sigma(F^2^) is used only for calculating R-factors(gt) etc. and is
not relevant to the choice of reflections for refinement. R-factors based
on F^2^ are statistically about twice as large as those based on F, and R-
factors based on ALL data will be even larger.
;

_reflns_number_total             4227
_reflns_number_gt                3391
_reflns_threshold_expression     >2sigma(I)

_refine_ls_structure_factor_coef Fsqd
_refine_ls_matrix_type           full
_refine_ls_R_factor_all          0.0611
_refine_ls_R_factor_gt           0.0467
_refine_ls_wR_factor_gt          0.1124
_refine_ls_wR_factor_ref         0.1216
_refine_ls_goodness_of_fit_ref   1.037
_refine_ls_restrained_S_all      1.037
_refine_ls_number_reflns         4227
_refine_ls_number_parameters     217
_refine_ls_number_restraints     0
_refine_ls_hydrogen_treatment    constr
_refine_ls_weighting_scheme      calc
_refine_ls_weighting_details     
'calc w=1/[\s^2^(Fo^2^)+(0.0484P)^2^+2.9993P] where P=(Fo^2^+2Fc^2^)/3'

_atom_sites_solution_hydrogens   geom
_atom_sites_solution_primary     direct
_atom_sites_solution_secondary   difmap

_refine_ls_shift/su_max          0.000
_refine_ls_shift/su_mean         0.000
_refine_diff_density_max         0.258
_refine_diff_density_min         -0.176
_refine_ls_extinction_method     none
_refine_ls_extinction_coef       ?

loop_
_atom_type_symbol
_atom_type_description
_atom_type_scat_dispersion_real
_atom_type_scat_dispersion_imag
_atom_type_scat_source
C C 0.0033 0.0016 'International Tables Vol C Tables 4.2.6.8 and 6.1.1.4'
H H 0.0000 0.0000 'International Tables Vol C Tables 4.2.6.8 and 6.1.1.4'

_computing_data_collection       'Bruker SMART APEX'
_computing_cell_refinement       'SAINT V7.66A (Bruker AXS, 2009)'
_computing_data_reduction        'SAINT V7.66A (Bruker AXS, 2009)'
_computing_structure_solution    'SHELXS-97 (Sheldrick, 2008)'
_computing_structure_refinement  'SHELXL-97 (Sheldrick, 2008)'
_computing_molecular_graphics    'Bruker SHELXTL'
_computing_publication_material  'Bruker SHELXTL'

loop_
_atom_site_type_symbol
_atom_site_label
_atom_site_fract_x
_atom_site_fract_y
_atom_site_fract_z
_atom_site_U_iso_or_equiv
_atom_site_adp_type
_atom_site_calc_flag
_atom_site_refinement_flags
_atom_site_occupancy
_atom_site_disorder_assembly
_atom_site_disorder_group
C C1 0.06368(6) 0.9303(2) 0.18319(5) 0.0253(2) Uani d . 1 . .
C C2 0.08933(6) 0.9225(2) 0.23020(5) 0.0267(2) Uani d . 1 . .
H H2 0.0798 1.0184 0.2565 0.032 Uiso calc R 1 . .
C C3 0.13430(6) 0.7441(2) 0.23495(5) 0.0262(2) Uani d . 1 . .
C C4 0.13449(6) 0.6416(2) 0.18998(5) 0.0267(2) Uani d . 1 . .
H H4 0.1579 0.5161 0.183 0.032 Uiso calc R 1 . .
C C5 0.09293(6) 0.7551(2) 0.15415(5) 0.0256(2) Uani d . 1 . .
C C6 0.08693(6) 0.7238(2) 0.10444(5) 0.0278(2) Uani d . 1 . .
H H6 0.0615 0.8235 0.0857 0.033 Uiso calc R 1 . .
C C7 0.01449(6) 1.0797(2) 0.16529(5) 0.0250(2) Uani d . 1 . .
C C8 -0.03219(6) 1.0200(2) 0.12979(5) 0.0283(2) Uani d . 1 . .
H H8 -0.0318 0.8791 0.1152 0.034 Uiso calc R 1 . .
C C9 -0.07881(6) 1.1644(2) 0.11581(5) 0.0315(2) Uani d . 1 . .
H H9 -0.1093 1.123 0.0909 0.038 Uiso calc R 1 . .
C C10 -0.08143(6) 1.3692(2) 0.13775(5) 0.0321(2) Uani d . 1 . .
H H10 -0.1139 1.4663 0.1285 0.039 Uiso calc R 1 . .
C C11 -0.03607(6) 1.4299(2) 0.17330(5) 0.0298(2) Uani d . 1 . .
H H11 -0.0376 1.5689 0.1887 0.036 Uiso calc R 1 . .
C C12 0.01150(6) 1.2884(2) 0.18642(5) 0.0266(2) Uani d . 1 . .
H H12 0.0428 1.3335 0.2103 0.032 Uiso calc R 1 . .
C C13 0.17354(6) 0.6991(2) 0.27999(5) 0.0272(2) Uani d . 1 . .
C C14 0.18353(6) 0.8581(2) 0.31694(5) 0.0303(2) Uani d . 1 . .
H H14 0.1636 0.995 0.3131 0.036 Uiso calc R 1 . .
C C15 0.22200(6) 0.8195(2) 0.35913(5) 0.0352(2) Uani d . 1 . .
H H15 0.2284 0.9298 0.3837 0.042 Uiso calc R 1 . .
C C16 0.25112(6) 0.6200(2) 0.36533(6) 0.0367(2) Uani d . 1 . .
H H16 0.2775 0.5931 0.3941 0.044 Uiso calc R 1 . .
C C17 0.24137(6) 0.4604(2) 0.32922(6) 0.0373(4) Uani d . 1 . .
H H17 0.2611 0.3234 0.3335 0.045 Uiso calc R 1 . .
C C18 0.20340(6) 0.4974(2) 0.28705(5) 0.0329(2) Uani d . 1 . .
H H18 0.1974 0.3861 0.2626 0.039 Uiso calc R 1 . .
C C19 0.11647(6) 0.5466(2) 0.07547(5) 0.0274(2) Uani d . 1 . .
H H19 0.1416 0.4542 0.0996 0.033 Uiso calc R 1 . .
C C20 0.06692(6) 0.4041(2) 0.04973(6) 0.0364(2) Uani d . 1 . .
H H20A 0.0419 0.3373 0.0754 0.044 Uiso calc R 1 . .
H H20B 0.0395 0.4958 0.0278 0.044 Uiso calc R 1 . .
C C21 0.09441(8) 0.2256(2) 0.01859(6) 0.0415(4) Uani d . 1 . .
H H21A 0.1178 0.1238 0.0411 0.05 Uiso calc R 1 . .
H H21B 0.0609 0.1428 0.0009 0.05 Uiso calc R 1 . .
C C22 0.13648(9) 0.3165(2) -0.01932(6) 0.0470(4) Uani d . 1 . .
H H22A 0.1122 0.4032 -0.0445 0.056 Uiso calc R 1 . .
H H22B 0.1559 0.1951 -0.0369 0.056 Uiso calc R 1 . .
C C23 0.18594(9) 0.4589(2) 0.00572(6) 0.0529(5) Uani d . 1 . .
H H23A 0.2105 0.5257 -0.0202 0.063 Uiso calc R 1 . .
H H23B 0.2137 0.3678 0.0275 0.063 Uiso calc R 1 . .
C C24 0.15842(8) 0.6386(2) 0.03721(6) 0.0467(4) Uani d . 1 . .
H H24A 0.192 0.7215 0.0548 0.056 Uiso calc R 1 . .
H H24B 0.1349 0.7403 0.0148 0.056 Uiso calc R 1 . .

loop_
_atom_site_aniso_label
_atom_site_aniso_U_11
_atom_site_aniso_U_22
_atom_site_aniso_U_33
_atom_site_aniso_U_12
_atom_site_aniso_U_13
_atom_site_aniso_U_23
C1 0.0245(5) 0.0220(5) 0.0302(7) -0.0015(5) 0.0080(5) -0.0005(5)
C2 0.0274(7) 0.0248(5) 0.0287(5) 0.0023(5) 0.0082(5) -0.0015(5)
C3 0.0246(7) 0.0243(5) 0.0304(7) -0.0011(5) 0.0079(5) 0.0003(5)
C4 0.0246(7) 0.0236(5) 0.0324(7) 0.0007(5) 0.0055(5) -0.0017(5)
C5 0.0245(5) 0.0227(5) 0.0299(5) -0.0027(5) 0.0047(5) -0.0015(5)
C6 0.0273(7) 0.0251(5) 0.0312(7) -0.0003(5) 0.0039(5) -0.0001(5)
C7 0.0255(7) 0.0249(5) 0.0252(5) -0.0018(5) 0.0084(5) 0.0022(5)
C8 0.0288(7) 0.0269(5) 0.0298(7) -0.0020(5) 0.0061(5) 0.0000(5)
C9 0.0287(7) 0.0378(8) 0.0283(7) -0.0029(5) 0.0028(5) 0.0024(5)
C10 0.0315(7) 0.0336(7) 0.0319(7) 0.0062(5) 0.0088(5) 0.0079(5)
C11 0.0362(8) 0.0248(5) 0.0293(7) 0.0008(5) 0.0100(5) 0.0022(5)
C12 0.0299(7) 0.0258(5) 0.0246(5) -0.0024(5) 0.0064(5) 0.0012(5)
C13 0.0239(7) 0.0292(7) 0.0291(5) 0.0020(5) 0.0076(5) 0.0019(5)
C14 0.0313(7) 0.0287(7) 0.0313(7) 0.0026(5) 0.0046(5) 0.0019(5)
C15 0.0359(8) 0.0373(8) 0.0321(7) -0.0006(5) 0.0004(5) -0.0005(5)
C16 0.0290(7) 0.0457(9) 0.0355(8) 0.0045(5) 0.0004(5) 0.0060(7)
C17 0.0320(8) 0.0397(8) 0.0407(8) 0.0116(5) 0.0061(5) 0.0047(7)
C18 0.0328(7) 0.0318(7) 0.0346(7) 0.0057(5) 0.0070(5) -0.0015(5)
C19 0.0297(7) 0.0259(5) 0.0265(5) 0.0010(5) 0.0007(5) -0.0033(5)
C20 0.0350(8) 0.0359(8) 0.0382(8) -0.0054(5) 0.0010(5) -0.0056(5)
C21 0.0488(10) 0.0348(8) 0.0405(8) -0.0066(7) -0.0014(7) -0.0118(7)
C22 0.0737(11) 0.0390(9) 0.0289(7) 0.0014(8) 0.0085(8) -0.0073(7)
C23 0.0600(11) 0.0393(9) 0.0628(11) -0.0068(8) 0.0349(9) -0.0170(8)
C24 0.0525(10) 0.0328(8) 0.0574(10) -0.0107(7) 0.0279(8) -0.0141(7)

_geom_special_details            
;
All esds (except the esd in the dihedral angle between two l.s. planes)
are estimated using the full covariance matrix. The cell esds are taken
into account individually in the estimation of esds in distances, angles
and torsion angles; correlations between esds in cell parameters are only
used when they are defined by crystal symmetry. An approximate (isotropic)
treatment of cell esds is used for estimating esds involving l.s. planes.
;

loop_
_geom_bond_atom_site_label_1
_geom_bond_atom_site_label_2
_geom_bond_site_symmetry_2
_geom_bond_distance
_geom_bond_publ_flag
C1 C2 . 1.349(2) ?
C1 C7 . 1.4732(18) ?
C1 C5 . 1.4921(18) ?
C2 C3 . 1.4729(18) ?
C2 H2 . 0.95 ?
C3 C4 . 1.3583(18) ?
C3 C13 . 1.466(2) ?
C4 C5 . 1.460(2) ?
C4 H4 . 0.95 ?
C5 C6 . 1.3428(18) ?
C6 C19 . 1.5031(18) ?
C6 H6 . 0.95 ?
C7 C8 . 1.403(2) ?
C7 C12 . 1.4049(18) ?
C8 C9 . 1.387(2) ?
C8 H8 . 0.95 ?
C9 C10 . 1.392(2) ?
C9 H9 . 0.95 ?
C10 C11 . 1.386(2) ?
C10 H10 . 0.95 ?
C11 C12 . 1.385(2) ?
C11 H11 . 0.95 ?
C12 H12 . 0.95 ?
C13 C14 . 1.398(2) ?
C13 C18 . 1.409(2) ?
C14 C15 . 1.390(2) ?
C14 H14 . 0.95 ?
C15 C16 . 1.387(2) ?
C15 H15 . 0.95 ?
C16 C17 . 1.385(2) ?
C16 H16 . 0.95 ?
C17 C18 . 1.382(2) ?
C17 H17 . 0.95 ?
C18 H18 . 0.95 ?
C19 C24 . 1.520(2) ?
C19 C20 . 1.526(2) ?
C19 H19 . 1.0 ?
C20 C21 . 1.521(2) ?
C20 H20A . 0.99 ?
C20 H20B . 0.99 ?
C21 C22 . 1.513(2) ?
C21 H21A . 0.99 ?
C21 H21B . 0.99 ?
C22 C23 . 1.517(3) ?
C22 H22A . 0.99 ?
C22 H22B . 0.99 ?
C23 C24 . 1.532(2) ?
C23 H23A . 0.99 ?
C23 H23B . 0.99 ?
C24 H24A . 0.99 ?
C24 H24B . 0.99 ?

loop_
_geom_angle_atom_site_label_1
_geom_angle_atom_site_label_2
_geom_angle_atom_site_label_3
_geom_angle_site_symmetry_1
_geom_angle_site_symmetry_3
_geom_angle
_geom_angle_publ_flag
C2 C1 C7 . . 125.64(12) ?
C2 C1 C5 . . 106.98(11) ?
C7 C1 C5 . . 127.35(12) ?
C1 C2 C3 . . 110.32(11) ?
C1 C2 H2 . . 124.8 ?
C3 C2 H2 . . 124.8 ?
C4 C3 C13 . . 127.61(12) ?
C4 C3 C2 . . 107.69(12) ?
C13 C3 C2 . . 124.61(12) ?
C3 C4 C5 . . 109.10(12) ?
C3 C4 H4 . . 125.4 ?
C5 C4 H4 . . 125.4 ?
C6 C5 C4 . . 127.19(12) ?
C6 C5 C1 . . 126.71(12) ?
C4 C5 C1 . . 105.77(11) ?
C5 C6 C19 . . 126.39(13) ?
C5 C6 H6 . . 116.8 ?
C19 C6 H6 . . 116.8 ?
C8 C7 C12 . . 117.59(12) ?
C8 C7 C1 . . 123.09(12) ?
C12 C7 C1 . . 119.22(12) ?
C9 C8 C7 . . 120.67(13) ?
C9 C8 H8 . . 119.7 ?
C7 C8 H8 . . 119.7 ?
C8 C9 C10 . . 120.80(13) ?
C8 C9 H9 . . 119.6 ?
C10 C9 H9 . . 119.6 ?
C11 C10 C9 . . 119.25(13) ?
C11 C10 H10 . . 120.4 ?
C9 C10 H10 . . 120.4 ?
C12 C11 C10 . . 120.15(13) ?
C12 C11 H11 . . 119.9 ?
C10 C11 H11 . . 119.9 ?
C11 C12 C7 . . 121.49(13) ?
C11 C12 H12 . . 119.3 ?
C7 C12 H12 . . 119.3 ?
C14 C13 C18 . . 117.88(13) ?
C14 C13 C3 . . 120.69(12) ?
C18 C13 C3 . . 121.42(12) ?
C15 C14 C13 . . 121.22(13) ?
C15 C14 H14 . . 119.4 ?
C13 C14 H14 . . 119.4 ?
C16 C15 C14 . . 120.03(14) ?
C16 C15 H15 . . 120.0 ?
C14 C15 H15 . . 120.0 ?
C17 C16 C15 . . 119.42(14) ?
C17 C16 H16 . . 120.3 ?
C15 C16 H16 . . 120.3 ?
C18 C17 C16 . . 121.00(14) ?
C18 C17 H17 . . 119.5 ?
C16 C17 H17 . . 119.5 ?
C17 C18 C13 . . 120.45(14) ?
C17 C18 H18 . . 119.8 ?
C13 C18 H18 . . 119.8 ?
C6 C19 C24 . . 111.69(11) ?
C6 C19 C20 . . 109.54(11) ?
C24 C19 C20 . . 110.39(12) ?
C6 C19 H19 . . 108.4 ?
C24 C19 H19 . . 108.4 ?
C20 C19 H19 . . 108.4 ?
C21 C20 C19 . . 111.67(13) ?
C21 C20 H20A . . 109.3 ?
C19 C20 H20A . . 109.3 ?
C21 C20 H20B . . 109.3 ?
C19 C20 H20B . . 109.3 ?
H20A C20 H20B . . 107.9 ?
C22 C21 C20 . . 111.94(13) ?
C22 C21 H21A . . 109.2 ?
C20 C21 H21A . . 109.2 ?
C22 C21 H21B . . 109.2 ?
C20 C21 H21B . . 109.2 ?
H21A C21 H21B . . 107.9 ?
C21 C22 C23 . . 111.17(13) ?
C21 C22 H22A . . 109.4 ?
C23 C22 H22A . . 109.4 ?
C21 C22 H22B . . 109.4 ?
C23 C22 H22B . . 109.4 ?
H22A C22 H22B . . 108.0 ?
C22 C23 C24 . . 111.54(15) ?
C22 C23 H23A . . 109.3 ?
C24 C23 H23A . . 109.3 ?
C22 C23 H23B . . 109.3 ?
C24 C23 H23B . . 109.3 ?
H23A C23 H23B . . 108.0 ?
C19 C24 C23 . . 111.82(13) ?
C19 C24 H24A . . 109.3 ?
C23 C24 H24A . . 109.3 ?
C19 C24 H24B . . 109.3 ?
C23 C24 H24B . . 109.3 ?
H24A C24 H24B . . 107.9 ?

loop_
_geom_torsion_atom_site_label_1
_geom_torsion_atom_site_label_2
_geom_torsion_atom_site_label_3
_geom_torsion_atom_site_label_4
_geom_torsion_site_symmetry_1
_geom_torsion_site_symmetry_2
_geom_torsion_site_symmetry_3
_geom_torsion_site_symmetry_4
_geom_torsion
_geom_torsion_publ_flag
C7 C1 C2 C3 . . . . 176.56(12) ?
C5 C1 C2 C3 . . . . -1.38(14) ?
C1 C2 C3 C4 . . . . -1.08(15) ?
C1 C2 C3 C13 . . . . 175.63(12) ?
C13 C3 C4 C5 . . . . -173.45(12) ?
C2 C3 C4 C5 . . . . 3.12(15) ?
C3 C4 C5 C6 . . . . 169.76(13) ?
C3 C4 C5 C1 . . . . -3.91(14) ?
C2 C1 C5 C6 . . . . -170.53(13) ?
C7 C1 C5 C6 . . . . 11.6(2) ?
C2 C1 C5 C4 . . . . 3.18(14) ?
C7 C1 C5 C4 . . . . -174.72(12) ?
C4 C5 C6 C19 . . . . 7.7(2) ?
C1 C5 C6 C19 . . . . -179.88(12) ?
C2 C1 C7 C8 . . . . -144.19(14) ?
C5 C1 C7 C8 . . . . 33.3(2) ?
C2 C1 C7 C12 . . . . 32.1(2) ?
C5 C1 C7 C12 . . . . -150.39(12) ?
C12 C7 C8 C9 . . . . 0.99(18) ?
C1 C7 C8 C9 . . . . 177.32(12) ?
C7 C8 C9 C10 . . . . -2.0(2) ?
C8 C9 C10 C11 . . . . 1.2(2) ?
C9 C10 C11 C12 . . . . 0.5(2) ?
C10 C11 C12 C7 . . . . -1.5(2) ?
C8 C7 C12 C11 . . . . 0.76(18) ?
C1 C7 C12 C11 . . . . -175.72(12) ?
C4 C3 C13 C14 . . . . 157.79(14) ?
C2 C3 C13 C14 . . . . -18.3(2) ?
C4 C3 C13 C18 . . . . -20.8(2) ?
C2 C3 C13 C18 . . . . 163.16(13) ?
C18 C13 C14 C15 . . . . 0.5(2) ?
C3 C13 C14 C15 . . . . -178.18(13) ?
C13 C14 C15 C16 . . . . -0.3(2) ?
C14 C15 C16 C17 . . . . -0.1(2) ?
C15 C16 C17 C18 . . . . 0.4(2) ?
C16 C17 C18 C13 . . . . -0.2(2) ?
C14 C13 C18 C17 . . . . -0.2(2) ?
C3 C13 C18 C17 . . . . 178.42(13) ?
C5 C6 C19 C24 . . . . -119.20(16) ?
C5 C6 C19 C20 . . . . 118.17(15) ?
C6 C19 C20 C21 . . . . 178.36(12) ?
C24 C19 C20 C21 . . . . 54.96(17) ?
C19 C20 C21 C22 . . . . -55.42(18) ?
C20 C21 C22 C23 . . . . 54.7(2) ?
C21 C22 C23 C24 . . . . -54.3(2) ?
C6 C19 C24 C23 . . . . -176.97(15) ?
C20 C19 C24 C23 . . . . -54.8(2) ?
C22 C23 C24 C19 . . . . 55.0(2) ?


#######################################################################
#
#                 Cambridge Crystallographic Data Centre
#                                CCDC 
# 
#######################################################################
# 
#  This CIF contains data from an original supplementary publication 
#  deposited with the CCDC, and may include chemical, crystal,   
#  experimental, refinement, atomic coordinates, 
#  anisotropic displacement parameters and molecular geometry data,
#  as required by the journal to which it was submitted. 
# 
#  This CIF is provided on the understanding that it is used for bona
#  fide research purposes only. It may contain copyright material 
#  of the CCDC or of third parties, and may not be copied or further 
#  disseminated in any form, whether machine-readable or not,  
#  except for the purpose of generating routine backup copies 
#  on your local computer system.
# 
#  For further information on the CCDC, data deposition and 
#  data retrieval see:
#                         www.ccdc.cam.ac.uk 
#
#  Bona fide researchers may freely download Mercury and enCIFer
#  from this site to visualise CIF-encoded structures and 
#  to carry out CIF format checking respectively. 
#
####################################################################### 

data_compound_4
_database_code_depnum_ccdc_archive 'CCDC 863753'
#TrackingRef '9140_web_deposit_cif_file_0_GaryJ.Balaich_1327032551.6tb.cif'

_audit_creation_method           'APEX2 v2009.7-0'

_chemical_name_systematic        6-(tert-butyl)-1,3-diphenylfulvene
_chemical_name_common            6-(tert-butyl)-1,3-diphenylfulvene
_chemical_formula_moiety         'C22 H22'
_chemical_formula_sum            'C22 H22'
_chemical_formula_iupac          'C22 H22'
_chemical_formula_weight         286.40
_chemical_melting_point          ?

_symmetry_cell_setting           monoclinic
_symmetry_space_group_name_H-M   'C 1 2/c 1'
_symmetry_space_group_name_Hall  '-C 2yc'
loop_
_symmetry_equiv_pos_as_xyz
'x, y, z'
'-x, y, -z+1/2'
'x+1/2, y+1/2, z'
'-x+1/2, y+1/2, -z+1/2'
'-x, -y, -z'
'x, -y, z-1/2'
'-x+1/2, -y+1/2, -z'
'x+1/2, -y+1/2, z-1/2'

_cell_length_a                   31.085(5)
_cell_length_b                   10.1123(18)
_cell_length_c                   10.3012(18)
_cell_angle_alpha                90
_cell_angle_beta                 90.279(2)
_cell_angle_gamma                90
_cell_volume                     3238.0(10)
_cell_formula_units_Z            8
_cell_measurement_reflns_used    4168
_cell_measurement_theta_min      2.6210
_cell_measurement_theta_max      28.0285
_cell_measurement_temperature    100.(2)

_exptl_crystal_description       'rectangular prism'
_exptl_crystal_colour            orange
_exptl_crystal_size_max          0.36
_exptl_crystal_size_mid          0.16
_exptl_crystal_size_min          0.14
_exptl_crystal_density_diffrn    1.175
_exptl_crystal_density_meas      ?
_exptl_crystal_density_method    'not measured'
_exptl_crystal_F_000             1232

_exptl_absorpt_coefficient_mu    0.066
_exptl_absorpt_correction_type   multi-scan
_exptl_absorpt_process_details   'Bruker SADABS, Version 2008/1'
_exptl_absorpt_correction_T_min  0.72
_exptl_absorpt_correction_T_max  0.99

_exptl_special_details           
;
;

_diffrn_ambient_temperature      100.(2)

_diffrn_radiation_type           MoK\a
_diffrn_radiation_wavelength     0.71073
_diffrn_radiation_source         'fine-focus sealed tube'
_diffrn_radiation_monochromator  graphite

_diffrn_measurement_device_type  'Bruker SMART APEX CCD'
_diffrn_measurement_method       'phi and omega scans'

_diffrn_detector_area_resol_mean 8.3660

_diffrn_reflns_number            13179
_diffrn_reflns_av_R_equivalents  0.0313
_diffrn_reflns_av_sigmaI/netI    0.0299
_diffrn_reflns_theta_min         1.31
_diffrn_reflns_theta_max         27.10
_diffrn_reflns_theta_full        27.10
_diffrn_measured_fraction_theta_max 0.998
_diffrn_measured_fraction_theta_full 0.998
_diffrn_reflns_limit_h_min       -39
_diffrn_reflns_limit_h_max       39
_diffrn_reflns_limit_k_min       -12
_diffrn_reflns_limit_k_max       12
_diffrn_reflns_limit_l_min       -13
_diffrn_reflns_limit_l_max       13

_refine_special_details          
;
Refinement of F^2^ against ALL reflections. The weighted R-factor wR and
goodness of fit S are based on F^2^, conventional R-factors R are based
on F, with F set to zero for negative F^2^. The threshold expression of
F^2^ > 2sigma(F^2^) is used only for calculating R-factors(gt) etc. and is
not relevant to the choice of reflections for refinement. R-factors based
on F^2^ are statistically about twice as large as those based on F, and R-
factors based on ALL data will be even larger.
;

_reflns_number_total             3558
_reflns_number_gt                2952
_reflns_threshold_expression     >2sigma(I)

_refine_ls_structure_factor_coef Fsqd
_refine_ls_matrix_type           full
_refine_ls_R_factor_all          0.0539
_refine_ls_R_factor_gt           0.0435
_refine_ls_wR_factor_gt          0.1107
_refine_ls_wR_factor_ref         0.1177
_refine_ls_goodness_of_fit_ref   1.034
_refine_ls_restrained_S_all      1.034
_refine_ls_number_reflns         3558
_refine_ls_number_parameters     202
_refine_ls_number_restraints     0
_refine_ls_hydrogen_treatment    constr
_refine_ls_weighting_scheme      calc
_refine_ls_weighting_details     
'calc w=1/[\s^2^(Fo^2^)+(0.0653P)^2^+1.4728P] where P=(Fo^2^+2Fc^2^)/3'

_atom_sites_solution_hydrogens   geom
_atom_sites_solution_primary     direct
_atom_sites_solution_secondary   difmap

_refine_ls_shift/su_max          0.000
_refine_ls_shift/su_mean         0.000
_refine_diff_density_max         0.296
_refine_diff_density_min         -0.184
_refine_ls_extinction_method     none
_refine_ls_extinction_coef       ?

loop_
_atom_type_symbol
_atom_type_description
_atom_type_scat_dispersion_real
_atom_type_scat_dispersion_imag
_atom_type_scat_source
C C 0.0033 0.0016 'International Tables Vol C Tables 4.2.6.8 and 6.1.1.4'
H H 0.0000 0.0000 'International Tables Vol C Tables 4.2.6.8 and 6.1.1.4'

_computing_data_collection       'Bruker SMART APEX CCD'
_computing_cell_refinement       'SAINT V7.66A (Bruker AXS, 2009)'
_computing_data_reduction        'SAINT V7.66A (Bruker AXS, 2009)'
_computing_structure_solution    'SHELXS-97 (Sheldrick, 2008)'
_computing_structure_refinement  'SHELXL-97 (Sheldrick, 2008)'
_computing_molecular_graphics    'Bruker SHELXTL'
_computing_publication_material  'Bruker SHELXTL'

loop_
_atom_site_type_symbol
_atom_site_label
_atom_site_fract_x
_atom_site_fract_y
_atom_site_fract_z
_atom_site_U_iso_or_equiv
_atom_site_adp_type
_atom_site_calc_flag
_atom_site_refinement_flags
_atom_site_occupancy
_atom_site_disorder_assembly
_atom_site_disorder_group
C C1 0.12910(4) 0.20738(11) 0.54589(11) 0.0196(2) Uani d . 1 . .
C C2 0.16410(4) 0.22942(12) 0.62093(12) 0.0208(2) Uani d . 1 . .
H H2 0.1803 0.309 0.622 0.025 Uiso calc R 1 . .
C C3 0.17345(4) 0.11209(12) 0.70079(11) 0.0204(2) Uani d . 1 . .
C C4 0.14361(4) 0.01818(12) 0.67102(12) 0.0209(2) Uani d . 1 . .
H H4 0.1417 -0.0668 0.7099 0.025 Uiso calc R 1 . .
C C5 0.11487(4) 0.06881(11) 0.56968(11) 0.0200(2) Uani d . 1 . .
C C6 0.08521(4) 0.00669(12) 0.49592(12) 0.0198(2) Uani d . 1 . .
H H6 0.0715 0.06 0.4321 0.024 Uiso calc R 1 . .
C C7 0.10917(4) 0.30146(11) 0.45432(12) 0.0204(2) Uani d . 1 . .
C C8 0.06525(4) 0.33043(12) 0.45837(12) 0.0228(2) Uani d . 1 . .
H H8 0.0475 0.2862 0.5192 0.027 Uiso calc R 1 . .
C C9 0.04725(4) 0.42317(12) 0.37447(12) 0.0262(2) Uani d . 1 . .
H H9 0.0174 0.4432 0.3796 0.031 Uiso calc R 1 . .
C C10 0.07272(5) 0.48659(12) 0.28330(12) 0.0286(2) Uani d . 1 . .
H H10 0.0604 0.5495 0.2256 0.034 Uiso calc R 1 . .
C C11 0.11618(5) 0.45769(12) 0.27694(12) 0.0285(2) Uani d . 1 . .
H H11 0.1336 0.5003 0.2141 0.034 Uiso calc R 1 . .
C C12 0.13439(4) 0.36680(12) 0.36187(12) 0.0242(2) Uani d . 1 . .
H H12 0.1643 0.3486 0.3573 0.029 Uiso calc R 1 . .
C C13 0.20986(4) 0.10240(12) 0.79155(11) 0.0205(2) Uani d . 1 . .
C C14 0.24290(4) 0.19677(12) 0.78946(12) 0.0243(2) Uani d . 1 . .
H H14 0.2411 0.2691 0.7308 0.029 Uiso calc R 1 . .
C C15 0.27820(4) 0.18628(13) 0.87161(12) 0.0280(2) Uani d . 1 . .
H H15 0.3002 0.2513 0.8688 0.034 Uiso calc R 1 . .
C C16 0.28151(4) 0.08143(13) 0.95783(12) 0.0274(2) Uani d . 1 . .
H H16 0.3059 0.0735 1.0131 0.033 Uiso calc R 1 . .
C C17 0.24873(4) -0.01189(12) 0.96248(12) 0.0262(2) Uani d . 1 . .
H H17 0.2506 -0.0834 1.0221 0.031 Uiso calc R 1 . .
C C18 0.21336(4) -0.00143(12) 0.88091(12) 0.0238(2) Uani d . 1 . .
H H18 0.1911 -0.0657 0.8856 0.029 Uiso calc R 1 . .
C C19 0.07065(4) -0.13675(11) 0.50047(12) 0.0202(2) Uani d . 1 . .
C C20 0.10885(4) -0.23198(12) 0.48565(12) 0.0258(2) Uani d . 1 . .
H H20A 0.1234 -0.2146 0.4032 0.039 Uiso calc R 1 . .
H H20B 0.0984 -0.3234 0.4867 0.039 Uiso calc R 1 . .
H H20C 0.1291 -0.2187 0.5576 0.039 Uiso calc R 1 . .
C C21 0.04763(4) -0.16371(12) 0.62939(12) 0.0270(2) Uani d . 1 . .
H H21A 0.0677 -0.1499 0.7017 0.04 Uiso calc R 1 . .
H H21B 0.0373 -0.2552 0.6306 0.04 Uiso calc R 1 . .
H H21C 0.0232 -0.1032 0.6381 0.04 Uiso calc R 1 . .
C C22 0.03932(4) -0.16092(12) 0.38752(12) 0.0276(2) Uani d . 1 . .
H H22A 0.0142 -0.1034 0.3971 0.041 Uiso calc R 1 . .
H H22B 0.0301 -0.2536 0.388 0.041 Uiso calc R 1 . .
H H22C 0.0537 -0.1412 0.3053 0.041 Uiso calc R 1 . .

loop_
_atom_site_aniso_label
_atom_site_aniso_U_11
_atom_site_aniso_U_22
_atom_site_aniso_U_33
_atom_site_aniso_U_12
_atom_site_aniso_U_13
_atom_site_aniso_U_23
C1 0.0241(5) 0.0138(5) 0.0210(5) -0.0008(4) 0.0040(5) -0.0015(4)
C2 0.0252(5) 0.0135(5) 0.0238(5) -0.0016(4) 0.0039(5) -0.0016(5)
C3 0.0247(5) 0.0168(5) 0.0197(5) 0.0017(4) 0.0042(5) -0.0013(5)
C4 0.0250(5) 0.0154(5) 0.0223(5) -0.0004(4) 0.0020(5) 0.0012(5)
C5 0.0241(5) 0.0147(5) 0.0213(5) -0.0002(4) 0.0043(5) 0.0011(5)
C6 0.0233(5) 0.0146(5) 0.0214(5) 0.0010(4) 0.0022(5) 0.0018(4)
C7 0.0281(5) 0.0123(5) 0.0208(5) -0.0020(4) -0.0009(5) -0.0029(4)
C8 0.0288(5) 0.0154(5) 0.0243(5) -0.0014(5) 0.0007(5) -0.0016(5)
C9 0.0306(7) 0.0169(5) 0.0308(7) 0.0012(5) -0.0063(5) -0.0039(5)
C10 0.0461(8) 0.0137(5) 0.0261(7) 0.0000(5) -0.0076(5) 0.0003(5)
C11 0.0444(8) 0.0170(5) 0.0241(5) -0.0066(5) 0.0021(5) 0.0016(5)
C12 0.0293(7) 0.0169(5) 0.0265(5) -0.0033(5) 0.0017(5) -0.0016(5)
C13 0.0236(5) 0.0176(5) 0.0203(5) 0.0012(5) 0.0035(5) -0.0034(5)
C14 0.0274(5) 0.0205(5) 0.0250(5) -0.0017(5) 0.0013(5) 0.0001(5)
C15 0.0257(5) 0.0276(7) 0.0306(7) -0.0034(5) 0.0001(5) -0.0028(5)
C16 0.0250(5) 0.0320(7) 0.0252(7) 0.0044(5) -0.0018(5) -0.0038(5)
C17 0.0303(7) 0.0246(7) 0.0236(5) 0.0058(5) 0.0026(5) 0.0016(5)
C18 0.0261(5) 0.0203(5) 0.0250(5) -0.0001(5) 0.0035(5) -0.0002(5)
C19 0.0241(5) 0.0136(5) 0.0229(5) -0.0018(4) -0.0005(5) 0.0010(5)
C20 0.0279(7) 0.0166(5) 0.0329(7) 0.0004(5) -0.0004(5) -0.0024(5)
C21 0.0326(7) 0.0183(5) 0.0300(7) -0.0025(5) 0.0051(5) 0.0026(5)
C22 0.0336(7) 0.0172(5) 0.0319(7) -0.0040(5) -0.0071(5) 0.0011(5)

_geom_special_details            
;
All esds (except the esd in the dihedral angle between two l.s. planes)
are estimated using the full covariance matrix. The cell esds are taken
into account individually in the estimation of esds in distances, angles
and torsion angles; correlations between esds in cell parameters are only
used when they are defined by crystal symmetry. An approximate (isotropic)
treatment of cell esds is used for estimating esds involving l.s. planes.
;

loop_
_geom_bond_atom_site_label_1
_geom_bond_atom_site_label_2
_geom_bond_site_symmetry_2
_geom_bond_distance
_geom_bond_publ_flag
C1 C2 . 1.3501(17) ?
C1 C7 . 1.4740(17) ?
C1 C5 . 1.4901(16) ?
C2 C3 . 1.4720(17) ?
C2 H2 . 0.95 ?
C3 C4 . 1.3615(17) ?
C3 C13 . 1.4677(17) ?
C4 C5 . 1.4631(17) ?
C4 H4 . 0.95 ?
C5 C6 . 1.3474(17) ?
C6 C19 . 1.5202(16) ?
C6 H6 . 0.95 ?
C7 C8 . 1.3970(17) ?
C7 C12 . 1.4020(17) ?
C8 C9 . 1.3911(18) ?
C8 H8 . 0.95 ?
C9 C10 . 1.388(2) ?
C9 H9 . 0.95 ?
C10 C11 . 1.384(2) ?
C10 H10 . 0.95 ?
C11 C12 . 1.3878(18) ?
C11 H11 . 0.95 ?
C12 H12 . 0.95 ?
C13 C18 . 1.4003(18) ?
C13 C14 . 1.4020(17) ?
C14 C15 . 1.3867(18) ?
C14 H14 . 0.95 ?
C15 C16 . 1.387(2) ?
C15 H15 . 0.95 ?
C16 C17 . 1.390(2) ?
C16 H16 . 0.95 ?
C17 C18 . 1.3846(18) ?
C17 H17 . 0.95 ?
C18 H18 . 0.95 ?
C19 C22 . 1.5334(17) ?
C19 C21 . 1.5361(17) ?
C19 C20 . 1.5369(17) ?
C20 H20A . 0.98 ?
C20 H20B . 0.98 ?
C20 H20C . 0.98 ?
C21 H21A . 0.98 ?
C21 H21B . 0.98 ?
C21 H21C . 0.98 ?
C22 H22A . 0.98 ?
C22 H22B . 0.98 ?
C22 H22C . 0.98 ?

loop_
_geom_angle_atom_site_label_1
_geom_angle_atom_site_label_2
_geom_angle_atom_site_label_3
_geom_angle_site_symmetry_1
_geom_angle_site_symmetry_3
_geom_angle
_geom_angle_publ_flag
C2 C1 C7 . . 126.50(11) ?
C2 C1 C5 . . 107.46(10) ?
C7 C1 C5 . . 126.02(10) ?
C1 C2 C3 . . 110.08(10) ?
C1 C2 H2 . . 125.0 ?
C3 C2 H2 . . 125.0 ?
C4 C3 C13 . . 128.27(11) ?
C4 C3 C2 . . 107.69(11) ?
C13 C3 C2 . . 124.01(11) ?
C3 C4 C5 . . 109.24(11) ?
C3 C4 H4 . . 125.4 ?
C5 C4 H4 . . 125.4 ?
C6 C5 C4 . . 130.77(11) ?
C6 C5 C1 . . 123.27(11) ?
C4 C5 C1 . . 105.41(10) ?
C5 C6 C19 . . 129.08(11) ?
C5 C6 H6 . . 115.5 ?
C19 C6 H6 . . 115.5 ?
C8 C7 C12 . . 118.11(11) ?
C8 C7 C1 . . 121.60(11) ?
C12 C7 C1 . . 120.28(11) ?
C9 C8 C7 . . 120.87(12) ?
C9 C8 H8 . . 119.6 ?
C7 C8 H8 . . 119.6 ?
C10 C9 C8 . . 120.17(12) ?
C10 C9 H9 . . 119.9 ?
C8 C9 H9 . . 119.9 ?
C11 C10 C9 . . 119.64(12) ?
C11 C10 H10 . . 120.2 ?
C9 C10 H10 . . 120.2 ?
C10 C11 C12 . . 120.35(12) ?
C10 C11 H11 . . 119.8 ?
C12 C11 H11 . . 119.8 ?
C11 C12 C7 . . 120.83(12) ?
C11 C12 H12 . . 119.6 ?
C7 C12 H12 . . 119.6 ?
C18 C13 C14 . . 117.77(11) ?
C18 C13 C3 . . 121.73(11) ?
C14 C13 C3 . . 120.49(11) ?
C15 C14 C13 . . 121.07(12) ?
C15 C14 H14 . . 119.5 ?
C13 C14 H14 . . 119.5 ?
C16 C15 C14 . . 120.36(12) ?
C16 C15 H15 . . 119.8 ?
C14 C15 H15 . . 119.8 ?
C15 C16 C17 . . 119.29(12) ?
C15 C16 H16 . . 120.4 ?
C17 C16 H16 . . 120.4 ?
C18 C17 C16 . . 120.49(12) ?
C18 C17 H17 . . 119.8 ?
C16 C17 H17 . . 119.8 ?
C17 C18 C13 . . 121.01(12) ?
C17 C18 H18 . . 119.5 ?
C13 C18 H18 . . 119.5 ?
C6 C19 C22 . . 108.47(10) ?
C6 C19 C21 . . 109.63(10) ?
C22 C19 C21 . . 109.32(10) ?
C6 C19 C20 . . 111.39(10) ?
C22 C19 C20 . . 108.24(10) ?
C21 C19 C20 . . 109.76(10) ?
C19 C20 H20A . . 109.5 ?
C19 C20 H20B . . 109.5 ?
H20A C20 H20B . . 109.5 ?
C19 C20 H20C . . 109.5 ?
H20A C20 H20C . . 109.5 ?
H20B C20 H20C . . 109.5 ?
C19 C21 H21A . . 109.5 ?
C19 C21 H21B . . 109.5 ?
H21A C21 H21B . . 109.5 ?
C19 C21 H21C . . 109.5 ?
H21A C21 H21C . . 109.5 ?
H21B C21 H21C . . 109.5 ?
C19 C22 H22A . . 109.5 ?
C19 C22 H22B . . 109.5 ?
H22A C22 H22B . . 109.5 ?
C19 C22 H22C . . 109.5 ?
H22A C22 H22C . . 109.5 ?
H22B C22 H22C . . 109.5 ?

loop_
_geom_torsion_atom_site_label_1
_geom_torsion_atom_site_label_2
_geom_torsion_atom_site_label_3
_geom_torsion_atom_site_label_4
_geom_torsion_site_symmetry_1
_geom_torsion_site_symmetry_2
_geom_torsion_site_symmetry_3
_geom_torsion_site_symmetry_4
_geom_torsion
_geom_torsion_publ_flag
C7 C1 C2 C3 . . . . 178.95(11) ?
C5 C1 C2 C3 . . . . -2.60(13) ?
C1 C2 C3 C4 . . . . 0.74(14) ?
C1 C2 C3 C13 . . . . 178.90(11) ?
C13 C3 C4 C5 . . . . -176.55(11) ?
C2 C3 C4 C5 . . . . 1.50(13) ?
C3 C4 C5 C6 . . . . 168.50(12) ?
C3 C4 C5 C1 . . . . -2.99(13) ?
C2 C1 C5 C6 . . . . -168.89(11) ?
C7 C1 C5 C6 . . . . 9.57(18) ?
C2 C1 C5 C4 . . . . 3.40(13) ?
C7 C1 C5 C4 . . . . -178.14(11) ?
C4 C5 C6 C19 . . . . 3.6(2) ?
C1 C5 C6 C19 . . . . 173.73(11) ?
C2 C1 C7 C8 . . . . -128.00(14) ?
C5 C1 C7 C8 . . . . 53.83(17) ?
C2 C1 C7 C12 . . . . 50.61(17) ?
C5 C1 C7 C12 . . . . -127.56(13) ?
C12 C7 C8 C9 . . . . -1.08(18) ?
C1 C7 C8 C9 . . . . 177.55(11) ?
C7 C8 C9 C10 . . . . 1.29(18) ?
C8 C9 C10 C11 . . . . -0.4(2) ?
C9 C10 C11 C12 . . . . -0.6(2) ?
C10 C11 C12 C7 . . . . 0.8(2) ?
C8 C7 C12 C11 . . . . 0.03(18) ?
C1 C7 C12 C11 . . . . -178.62(11) ?
C4 C3 C13 C18 . . . . -13.2(2) ?
C2 C3 C13 C18 . . . . 169.03(11) ?
C4 C3 C13 C14 . . . . 165.61(12) ?
C2 C3 C13 C14 . . . . -12.15(17) ?
C18 C13 C14 C15 . . . . 1.10(18) ?
C3 C13 C14 C15 . . . . -177.77(11) ?
C13 C14 C15 C16 . . . . 0.1(2) ?
C14 C15 C16 C17 . . . . -1.0(2) ?
C15 C16 C17 C18 . . . . 0.8(2) ?
C16 C17 C18 C13 . . . . 0.4(2) ?
C14 C13 C18 C17 . . . . -1.33(18) ?
C3 C13 C18 C17 . . . . 177.51(11) ?
C5 C6 C19 C22 . . . . -174.59(12) ?
C5 C6 C19 C21 . . . . 66.11(16) ?
C5 C6 C19 C20 . . . . -55.57(17) ?
